# Supplementary material
Source: PubMed Central journal article supplement (PMC10727849)
Supplement: NIHMS1951290-supplement-Supporting_Info.pdf [file NIHMS1951290-supplement-Supporting_Info.pdf]

## Supporting Information

### ***Lipid Nanoparticle Delivery of Small Proteins for Potent In Vivo RAS Inhibition***

*Rebecca M. Haley<sup>1†</sup>, Alexander Chan<sup>1†</sup>, Margaret M. Billingsley<sup>1</sup>, Ningqiang Gong<sup>1</sup>, Marshall S. Padilla<sup>1</sup>, Emily H. Kim<sup>2</sup>, Hejia Wang<sup>3</sup>, Dingzi Yin<sup>4</sup>, Kirk J. Wangensteen<sup>4\*</sup>, Andrew Tsourkas<sup>1\*</sup>, Michael J. Mitchell<sup>1\*</sup>*

<sup>1</sup>Department of Bioengineering, University of Pennsylvania, Philadelphia, PA 19104, United States

<sup>2</sup>Department of Chemical and Biomolecular Engineering, University of Pennsylvania, Philadelphia, PA 19104, United States

<sup>3</sup>Department of Biochemistry and Molecular Biophysics, University of Pennsylvania, Philadelphia, PA 19104, United States

<sup>4</sup>Division of Gastroenterology and Hepatology, Department of Medicine, Mayo Clinic, Rochester, MN 55902, United States

†Contributed equally to this work, \*Corresponding Author

E-mails: wangenstein.kirk@mayo.edu, atsourk@seas.upenn.edu, mjmitch@seas.upenn.edu

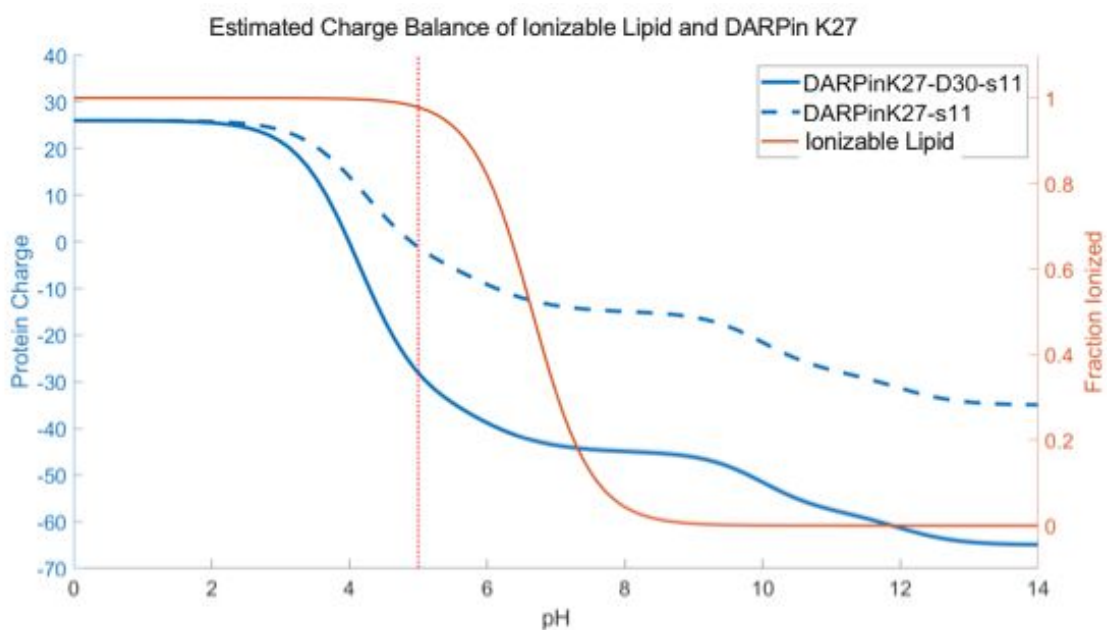

**Figure S1.** Estimated charges of ionizable lipid and K27 at variable pH, to illustrate the need for formulation at a pH which optimizes charge on both components. At pH 5, used in the optimized LNP formulations herein, the ionizable lipid remains positively charged and the DARPin remains negatively charged.

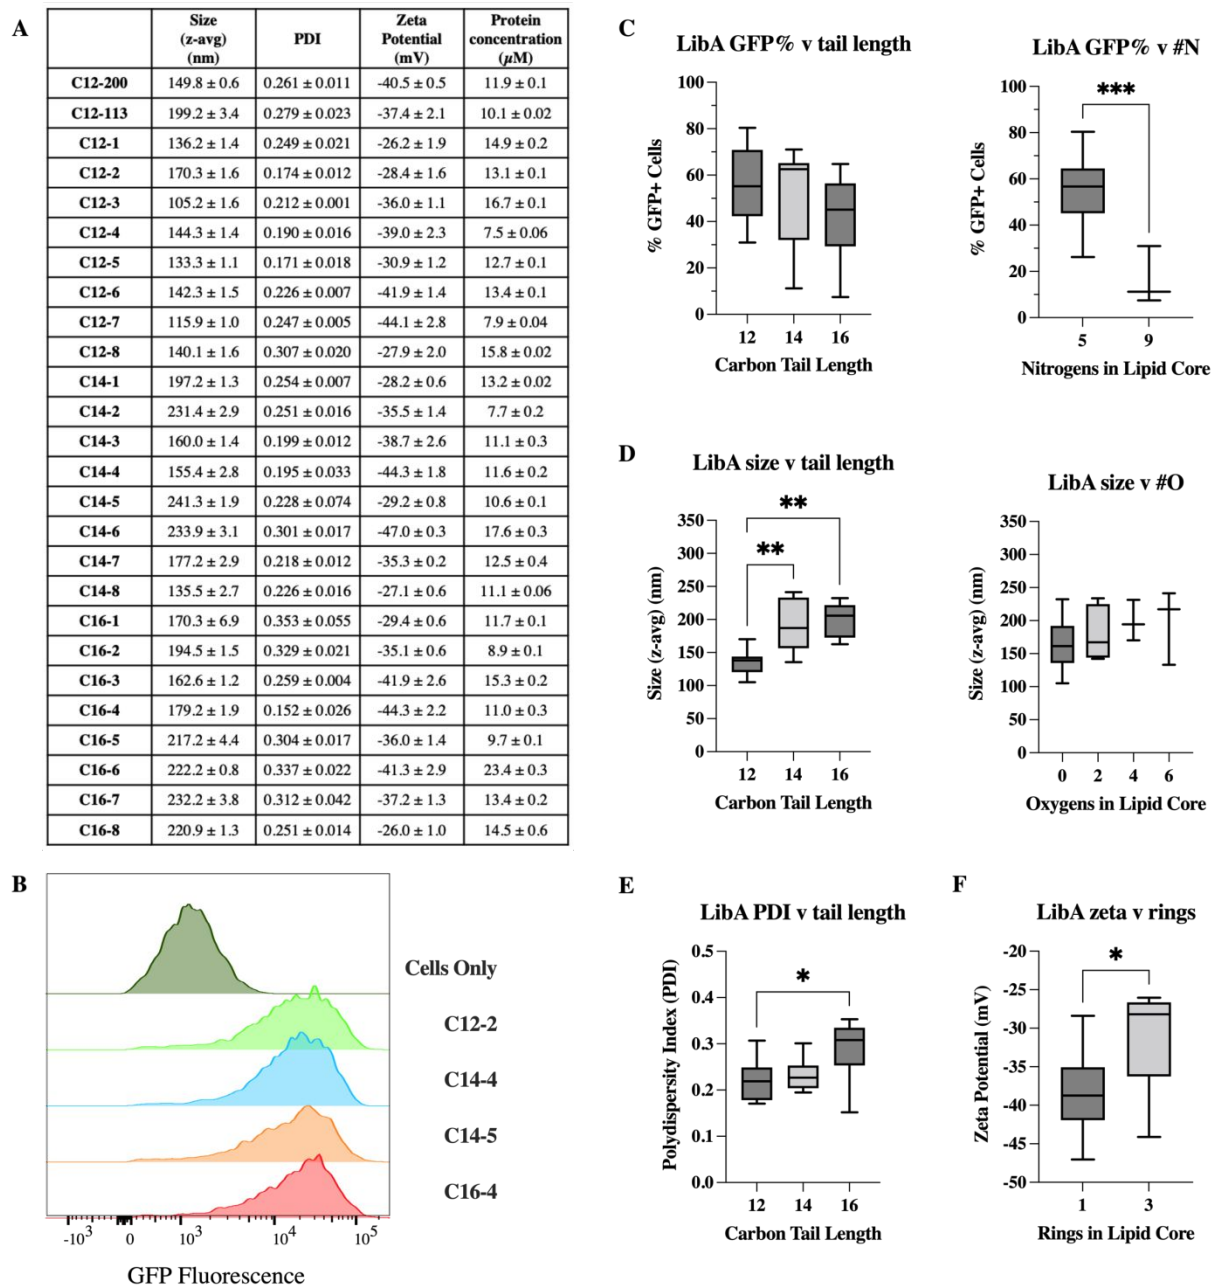

**Figure S2.** Additional characterization and analysis of LNPs formulated in library A. (A) Size (z-avg), PDI, surface zeta potential, and protein concentration of LNPs in library A. (B) Representative flow plots of untreated (control) and top performing LNPs from library A (C12-2, C14-4, C14-5, and C16-4). (C) Parameters—carbon tail length and number of Nitrogens in the polyamine core—with significant influence on delivery efficiency, measured by %GFP+ cells. (D) Parameters—carbon tail length and number of Oxygens in the polyamine core—with

significant influence on size (z-avg). (E) PDI was influenced by carbon tail length. (F) Surface zeta potential, was influenced by the number of rings in the lipid core.

| Identifier     | Ionizable Lipid | Helper (Neutral) Lipid | DOTAP% | Protein:Lipid Molar Ratio | Size (z-avg) (nm) | PDI               | Zeta Potential (mV) | Protein Concentration ( $\mu$ M) |
|----------------|-----------------|------------------------|--------|---------------------------|-------------------|-------------------|---------------------|----------------------------------|
| <b>C12-200</b> | C12-200         | DSPC                   | 50     | 1:50                      | 253.2 $\pm$ 4.5   | 0.363 $\pm$ 0.019 | -29.7 $\pm$ 0.5     | 10.5 $\pm$ 0.3                   |
| <b>B1</b>      | C12-2           | DSPC                   | 30     | 1:30                      | 206.4 $\pm$ 34.8  | 0.251 $\pm$ 0.109 | -31.2 $\pm$ 0.4     | 17.0 $\pm$ 0.1                   |
| <b>B2</b>      | C12-2           | DOPE                   | 40     | 1:50                      | 221.6 $\pm$ 1.3   | 0.204 $\pm$ 0.017 | -28.1 $\pm$ 0.8     | 11.2 $\pm$ 0.5                   |
| <b>B3</b>      | C12-2           | DSPC                   | 50     | 1:80                      | 192.0 $\pm$ 2.1   | 0.209 $\pm$ 0.020 | -25.5 $\pm$ 1.0     | 5.6 $\pm$ 0.05                   |
| <b>B4</b>      | C12-2           | DOPC                   | 60     | 1:120                     | 178.1 $\pm$ 2.6   | 0.128 $\pm$ 0.033 | 8.2 $\pm$ 0.5       | 3.2 $\pm$ 0.09                   |
| <b>B5</b>      | C14-4           | DSPC                   | 40     | 1:80                      | 174.8 $\pm$ 2.6   | 0.137 $\pm$ 0.034 | 14.1 $\pm$ 2.5      | 2.4 $\pm$ 0.07                   |
| <b>B6</b>      | C14-4           | DOPE                   | 30     | 1:120                     | 198.4 $\pm$ 4.4   | 0.237 $\pm$ 0.016 | 9.5 $\pm$ 1.2       | 2.2 $\pm$ 0.04                   |
| <b>B7</b>      | C14-4           | DSPC                   | 60     | 1:30                      | 161.9 $\pm$ 2.8   | 0.221 $\pm$ 0.011 | -37.3 $\pm$ 1.1     | 12.8 $\pm$ 0.4                   |
| <b>B8</b>      | C14-4           | DOPC                   | 50     | 1:50                      | 214.8 $\pm$ 2.1   | 0.298 $\pm$ 0.055 | -29.7 $\pm$ 0.8     | 9.5 $\pm$ 0.2                    |
| <b>B9</b>      | C14-5           | DSPC                   | 50     | 1:120                     | 208.0 $\pm$ 1.5   | 0.261 $\pm$ 0.007 | 11.1 $\pm$ 2.6      | 5.8 $\pm$ 0.1                    |
| <b>B10</b>     | C14-5           | DOPE                   | 60     | 1:80                      | 180.1 $\pm$ 1.0   | 0.108 $\pm$ 0.003 | 13.7 $\pm$ 0.4      | 2.7 $\pm$ 0.1                    |
| <b>B11</b>     | C14-5           | DSPC                   | 30     | 1:50                      | 251.3 $\pm$ 5.2   | 0.368 $\pm$ 0.055 | -28.6 $\pm$ 0.2     | 11.3 $\pm$ 0.1                   |
| <b>B12</b>     | C14-5           | DOPC                   | 40     | 1:30                      | 240.6 $\pm$ 4.1   | 0.323 $\pm$ 0.075 | -32.5 $\pm$ 1.2     | 10.9 $\pm$ 0.4                   |
| <b>B13</b>     | C16-4           | DSPC                   | 60     | 1:50                      | 172.2 $\pm$ 1.1   | 0.182 $\pm$ 0.019 | -37.5 $\pm$ 2.0     | 10.4 $\pm$ 0.2                   |
| <b>B14</b>     | C16-4           | DOPE                   | 50     | 1:30                      | 185.1 $\pm$ 2.3   | 0.304 $\pm$ 0.029 | -31.5 $\pm$ 1.1     | 15.4 $\pm$ 0.2                   |
| <b>B15</b>     | C16-4           | DSPC                   | 40     | 1:120                     | 189.2 $\pm$ 1.3   | 0.106 $\pm$ 0.001 | -20.7 $\pm$ 1.3     | 5.5 $\pm$ 0.5                    |
| <b>B16</b>     | C16-4           | DOPC                   | 30     | 1:80                      | 281.3 $\pm$ 6.9   | 0.287 $\pm$ 0.020 | -34.1 $\pm$ 1.4     | 5.7 $\pm$ 0.2                    |

**Figure S3.** Formulation parameters and additional characterization of LNPs formulated in library B, including size, PDI, zeta potential, and protein concentration.

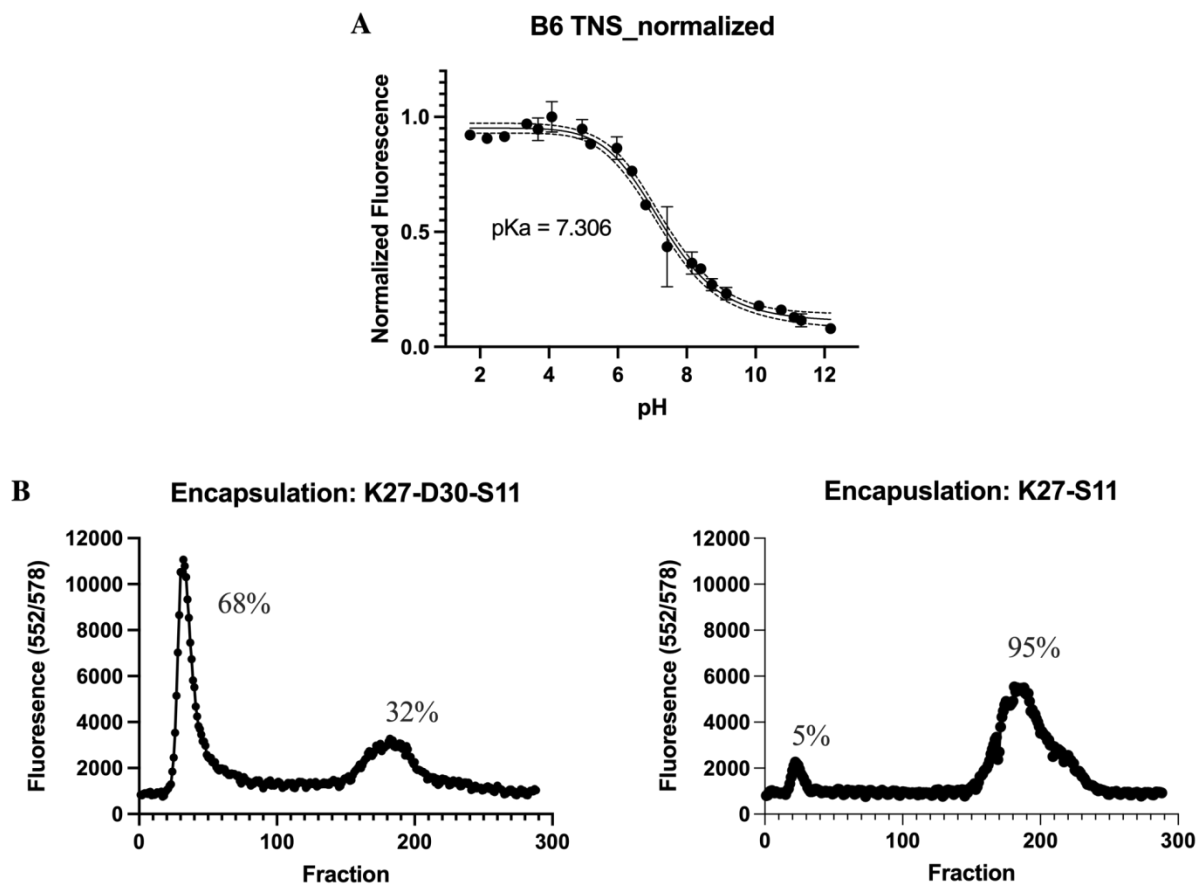

**Figure S4.** Additional characterization of the top performing LNP (B6). **(A)** TNS of B6 to evaluate ionizability of the LNP. pKa was found to be 7.306. **(B)** Encapsulation efficiency of B6 was evaluated using TAMRA-labelled K27 and a size exclusion gravity column. 68% of negative charged modified K27 (left) was found in fractions containing LNPs. In contrast, only 5% of non-charge modified K27 (right) was found in fractions containing LNPs.

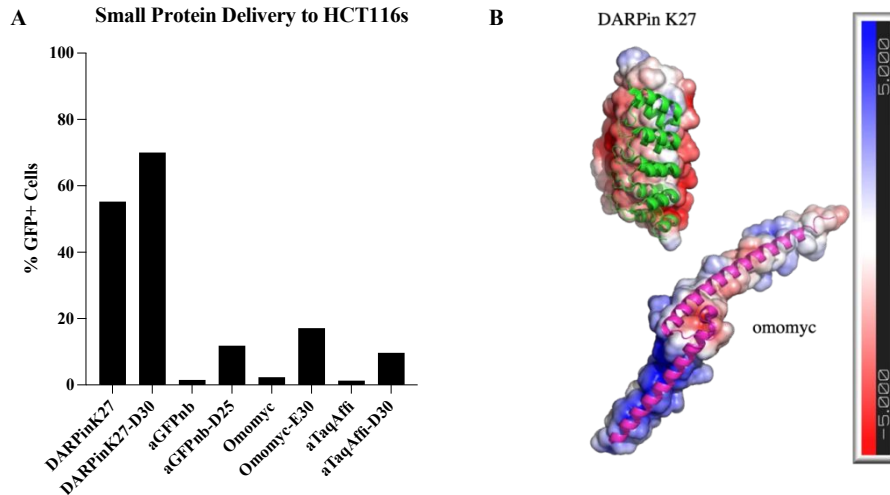

**Figure S5.** Alternative small proteins encapsulated and delivered to HCT116 cells *in vitro* using B6 LNPs. **(A)** Among the small proteins tested—nanobodies, omomyc, and affibodies—charge modification improved delivery, but no other small proteins were found to have good delivery with the K27-optimized B6 formulation. **(B)** Differences in structure and local charge between small protein scaffold types likely cause different requirements for LNP delivery system. PDB IDs 5O2S and 5I50 for DARPin K27 and omomyc, respectively.

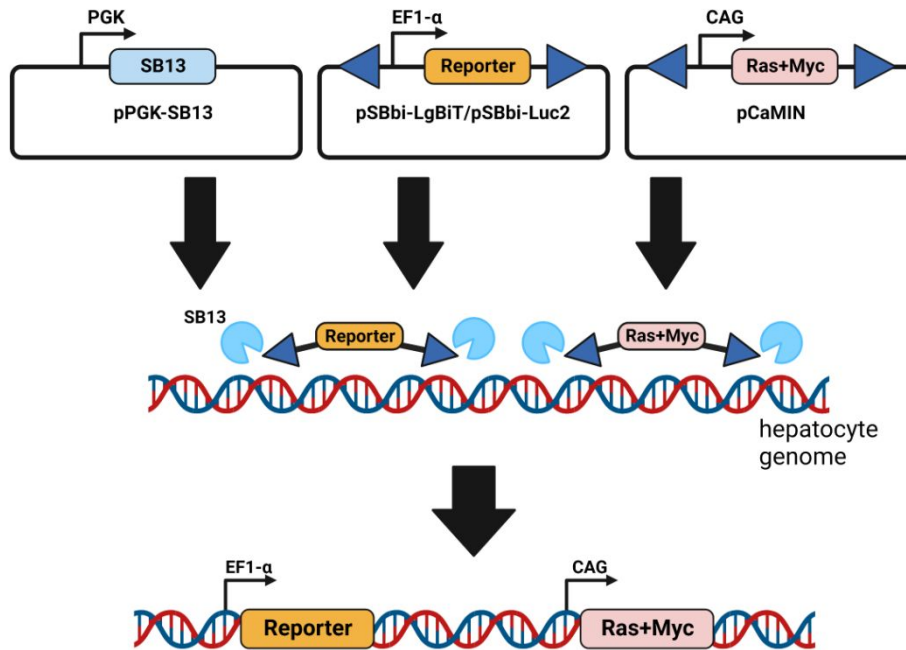

**Figure S6.** *Sleeping Beauty* transposon system used to insert different plasmids for different parts of this work: pPGK-SB13 for SB13 transposase plasmid, pSBbi-LgBiT or pSBbi-

Luc2 for split NanoLuc and firefly Luciferase reporters, and pCaMIN for the oncogenes MYC and NRAS<sup>G12V</sup>, which induce tumor growth. Figure was created with Biorender.com.

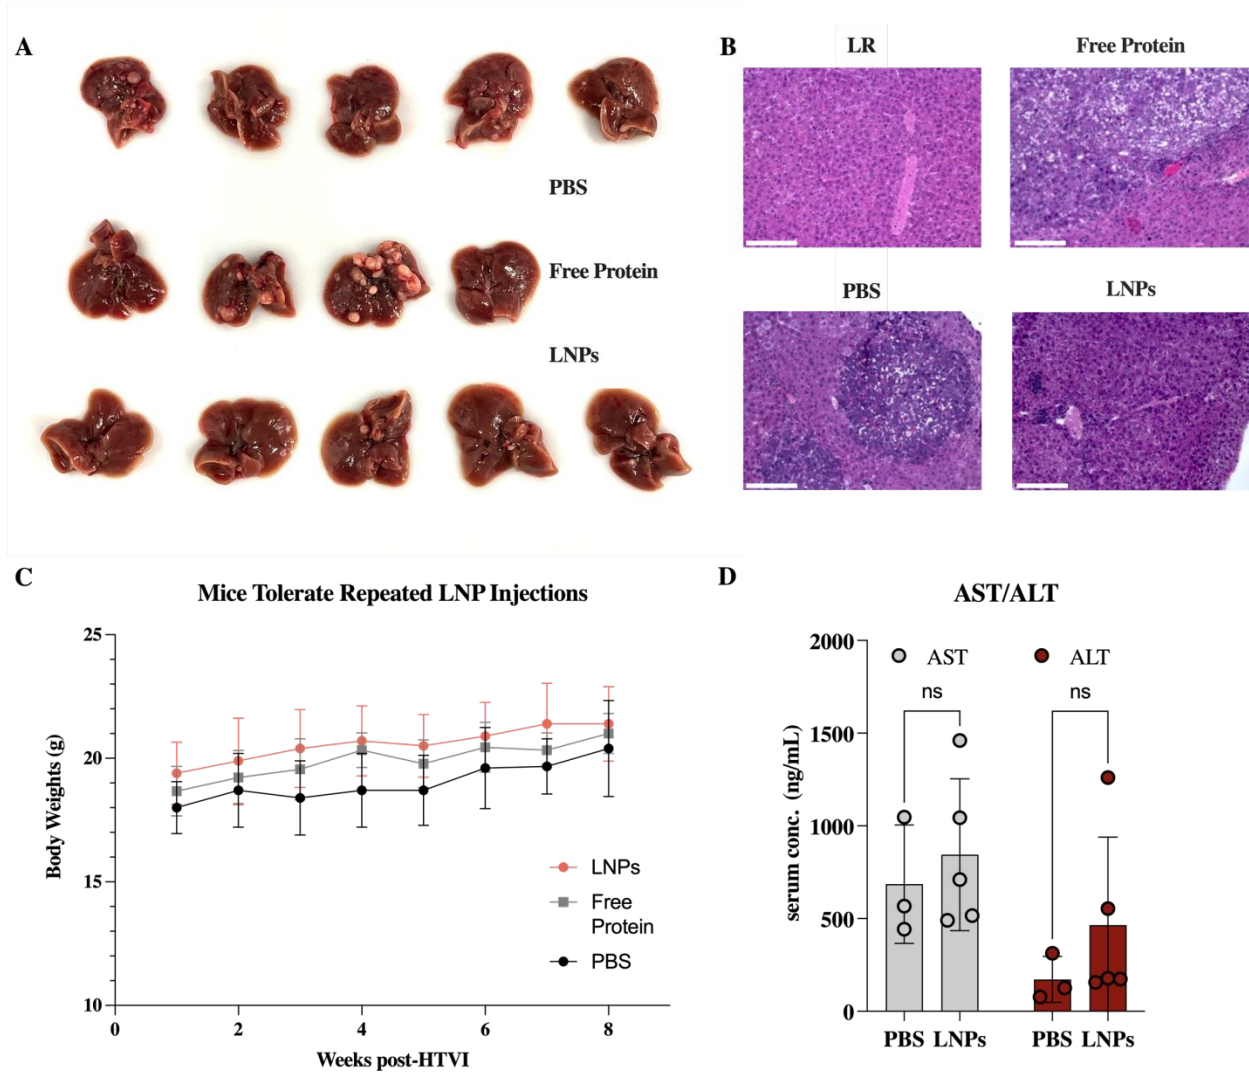

**Figure S7.** Additional *in vivo* therapeutic data. **(A)** Liver images from a subset of mice used in this study, showing type of tumor produced by HTVI method used herein. **(B)** Higher zoom on histology images (H&E stained) from Figure 9, which show tumor levels in LR (healthy), PBS, free protein, and LNP groups. Scale bar = 150  $\mu$ m. **(C)** Whole body weights of mice in this study show slight increase—due to growth—over time, with no significant difference between groups, indicating that mice tolerated repeat injections. **(D)** Serum concentrations of AST (aspartate aminotransferase) and ALT (alanine transaminase) in mice 24h after receiving PBS or LNP-

encapsulated K27-D30 at 4.5 mg/kg. Both liver toxicity markers are increased on average after LNP injection but are not statistically different from the PBS control.

**Table S1.** Amino acid sequences of proteins used in this work. Sequences assume elution with GGG peptide during protein purification. Underlined is the negative charge (ApP, D30 repeat sequence). In green is GFP s11, in yellow is HiBiT. Isoelectric point calculated by ExPASy pI/MW computational application.<sup>48</sup>

| Protein Name          | Amino Acid Sequence                                                                                                                                                                                                                  | M.W. (kDa) | Calculated Isoelectric Point |
|-----------------------|--------------------------------------------------------------------------------------------------------------------------------------------------------------------------------------------------------------------------------------|------------|------------------------------|
| DARPinK27-S11         | MDLGKKLLEAARAGQDDEVRLMANGADVNAHDTFGFTP<br>LHLAALYGHLEIVEVLLKNGADVNADDSYGRTPHLAAMR<br>GHLEIVEVLLKYGADVNAADEEGRTPLHLAAKRGHLEIVEV<br>LLKNGADVNAQDKFGKTAFDISIDNGNEDLAEILQKLgsgsgg<br>gsgsgsgsgsgsgg <u>RDHMLHEYVNAAGIT</u> sgsggsLPETGGG | 21.15      | 4.90                         |
| DARPinK27-D30-S11     | MDLGKKLLEAARAGQDDEVRLMANGADVNAHDTFGFTP<br>LHLAALYGHLEIVEVLLKNGADVNADDSYGRTPHLAAMR<br>GHLEIVEVLLKYGADVNAADEEGRTPLHLAAKRGHLEIVEV<br>LLKNGADVNAQDKFGKTAFDISIDNGNEDLAEILQKLgsgsgg<br>gss <u>RDHMLHEYVNAAGIT</u> sgsggsLPETGGG            | 24.49      | 3.99                         |
| DARPinK27n3-D30-S11   | MDLGKKLLEAARAGQDDEVRLMANGADVNAHDTFGFTP<br>LHLAALYGHLEIVEVLLKNGADVNADDSYGATPLHLAAMR<br>GHLEIVEVLLKYGADVNAADEEGATPLHLAAKAGHLEIVE<br>VLLKNGADVNAQDKFGKTAFDISIDNGNEDLAEILQKLgsgsg<br>ggsgss <u>RDHMLHEYVNAAGIT</u> sgsggsLPETGGG         | 24.23      | 3.90                         |
| DARPinK27-D30-HiBiT   | MDLGKKLLEAARAGQDDEVRLMANGADVNAHDTFGFTP<br>LHLAALYGHLEIVEVLLKNGADVNADDSYGRTPHLAAMR<br>GHLEIVEVLLKYGADVNAADEEGRTPLHLAAKRGHLEIVEV<br>LLKNGADVNAQDKFGKTAFDISIDNGNEDLAEILQKLgsgsgg<br>gss <u>VSGWRLFVKKIS</u> sgsggsLPETGGG               | 23.95      | 4.02                         |
| DARPinK27n3-D30-HiBiT | MDLGKKLLEAARAGQDDEVRLMANGADVNAHDTFGFTP<br>LHLAALYGHLEIVEVLLKNGADVNADDSYGATPLHLAAMR<br>GHLEIVEVLLKYGADVNAADEEGATPLHLAAKAGHLEIVE<br>VLLKNGADVNAQDKFGKTAFDISIDNGNEDLAEILQKLgsgsg<br>ggsgss <u>VSGWRLFVKKIS</u> sgsggsLPETGGG            | 23.70      | 3.92                         |



|                      |                                                                                                                                                                                                                                                                                                                                                                                                                   |       |      |
|----------------------|-------------------------------------------------------------------------------------------------------------------------------------------------------------------------------------------------------------------------------------------------------------------------------------------------------------------------------------------------------------------------------------------------------------------|-------|------|
| 3G124-D30-S11        | MDLGKKLLEAARAGQDDEVRLMANGADVNAADDVGVTP<br>LHLAAQRGHLEIVEVLLKYGADVNAADLWGQTPHLAAT<br>AGHLEIVEVLLKNGADV NARDNIGHTPLHLAAWAGHLEIV<br>EVLLKYGADVNAQDKFGKTPFDL AIDNGNEDIAEVLQKAA<br>ggsgggssDDDDDDDDDDDDDDDDDDDDDDDDDDDDDDssg<br>ggsggRDHMLHEYVNAAGITsgsggsLPETGGG                                                                                                                                                      | 24.29 | 3.92 |
| gc_R7-D30-S11        | MDLGKKLLEAARAGQDDEVRLMANGADVNAADDVGVTP<br>LHLAAQRGHLEIVEVLLKYGADVNAADLWGQTPHLAAT<br>AGHLEIVEVLLKNGADV NARDNIGHTPLHLAAWAGHLEIV<br>EVLLKYGADVNAQDKFGKTPFDL AIDNGNEDIAEVLQKAA<br>GGSGGGDVNAYDEVGWTPHRAAWGHLELVEKLLKNG<br>ADVNAADIDGYTPHLAAFSGHLEIVEVLLKYGADV NADD<br>QAGFTPLHLAAIFGHLEIVEVLLKNGADVNAQDKFGKTPFD<br>LAIDNGNEDIAEVLQKAggsgggssDDDDDDDDDDDDDDDD<br>DDDDDDDDDDDDDDssggsggRDHMLHEYVNAAGITsgsg<br>gsLPETGGG | 38.63 | 4.06 |
| Omomyc-S11           | MATEENVKRRTHNVLERQRRNELKRSFFALRDQIPELENNE<br>KAPKVILKKATAYILSVQAETQKLISEIDLLRKQNEQLKHK<br>LEQLRNCAggsgggssggsgggsggRDHMLHEYVNAAGITsg<br>sggsLPETGGG                                                                                                                                                                                                                                                               | 15.05 | 9.37 |
| Omomyc-E30-S11       | MATEENVKRRTHNVLERQRRNELKRSFFALRDQIPELENNE<br>KAPKVILKKATAYILSVQAETQKLISEIDLLRKQNEQLKHK<br>LEQLRNCAggsgggssEEEEEEEEEEEEEEEEEEEEEEEEEEEE<br>EEEssgggsggRDHMLHEYVNAAGITsgsggsLPETGGG                                                                                                                                                                                                                                 | 18.81 | 4.46 |
| aGFpnb-S11           | MAGsgsgsggMDQVQLVESGGALVQPGGSLRLSCAASGFPV<br>NRYSMRWYRQAPGREREWVAGMSSAGDRSSYEDSVRGRF<br>TISRDDARNTVYLQMNSLRPEDTAVYYCNVNVGFYWGQ<br>GTQVTVssggsgggssggsgggsggRDHMLHEYVNAAGITsgsg<br>gsLPETGGG                                                                                                                                                                                                                       | 18.03 | 5.64 |
| aGFpnb-D25-S11       | MAGsgsgsggMDQVQLVESGGALVQPGGSLRLSCAASGFPV<br>NRYSMRWYRQAPGREREWVAGMSSAGDRSSYEDSVRGRF<br>TISRDDARNTVYLQMNSLRPEDTAVYYCNVNVGFYWGQ<br>GTQVTVssggsgggssDDDDDDDDDDDDDDDDDDDDDDDDDD<br>ssggsggRDHMLHEYVNAAGITsgsggsLPETGGG                                                                                                                                                                                               | 20.79 | 3.91 |
| aTaqAffibody-S11     | MVDNKFNKELGWATWEIFNLPNLNGVQVKAFIDSLRDDPS<br>QSANLLAEAKKLNDQAQPKggsgggssggsgggsggRDHML<br>HEYVNAAGITsgsggsLPETGGG                                                                                                                                                                                                                                                                                                  | 10.79 | 5.16 |
| aTaqAffibody-D30-S11 | MVDNKFNKELGWATWEIFNLPNLNGVQVKAFIDSLRDDPS<br>QSANLLAEAKKLNDQAQPKggsgggssDDDDDDDDDDDDDD<br>DDDDDDDDDDDDDDssggsggRDHMLHEYVNAAGI<br>TsgsggsLPETGGG                                                                                                                                                                                                                                                                    | 14.13 | 3.62 |

**Table S2.** Structure diagrams and characterization of ionizable lipids used in this work.

| Lipid Identifier | Structure and Spectra                                                                                                                | Comments |
|------------------|--------------------------------------------------------------------------------------------------------------------------------------|----------|
| C12-200          | 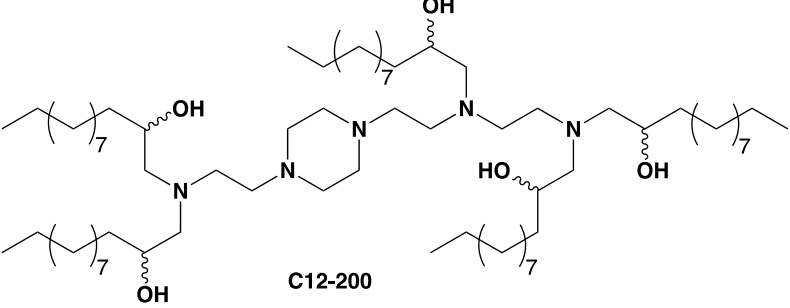 <p style="text-align: center;"><b>C12-200</b></p> |          |
| C12-113          |  <p style="text-align: center;"><b>C12-113</b></p> |          |
| C12-1            |  <p style="text-align: center;"><b>C12-1</b></p>  |          |



C12-2

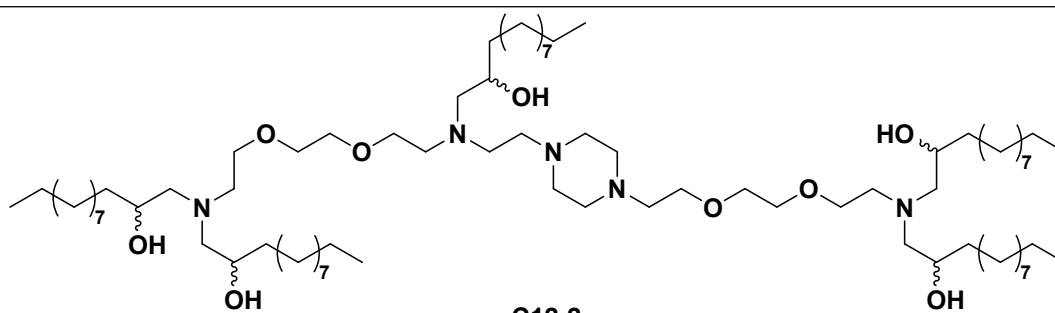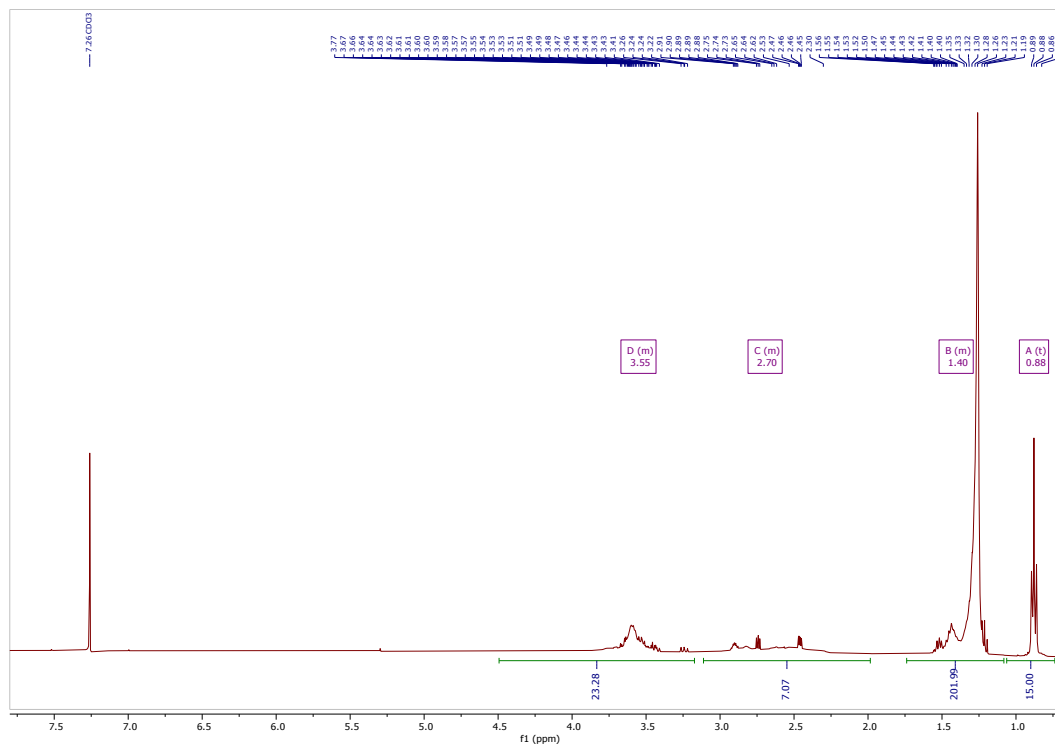

<sup>1</sup>H NMR  
(400  
MHz,  
CDCl<sub>3</sub>) δ  
4.51 –  
3.14 (m,  
23H), 3.04  
– 1.95 (m,  
7H), 1.89  
– 1.06 (m,  
202H),  
0.88 (t, *J*  
= 6.7 Hz,  
15H).

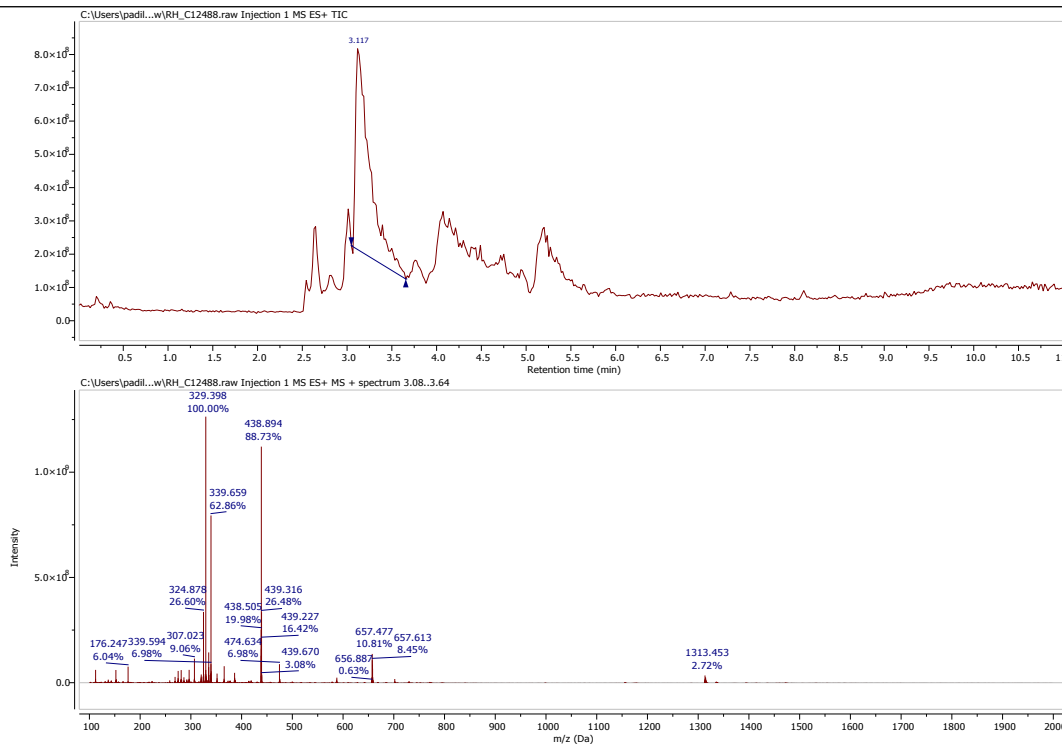

MS (ESI):  
calculated  
1313.16;  
found  
1313.45.

C12-3

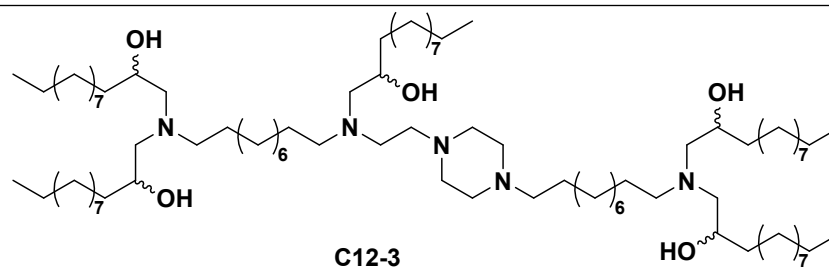

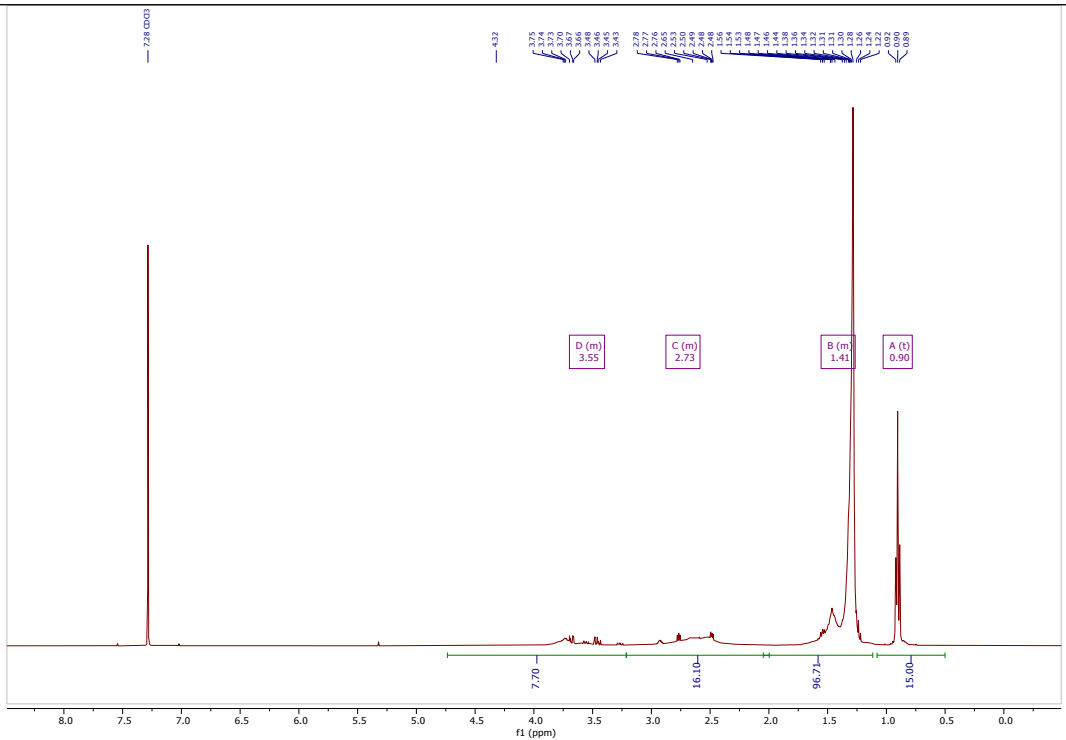

<sup>1</sup>H NMR (400 MHz, CDCl<sub>3</sub>) δ 4.65 – 3.10 (m, 8), 3.10 – 2.17 (m, 16H), 1.92 – 1.11 (m, 97H), 0.90 (t, *J* = 6.7 Hz, 15H).

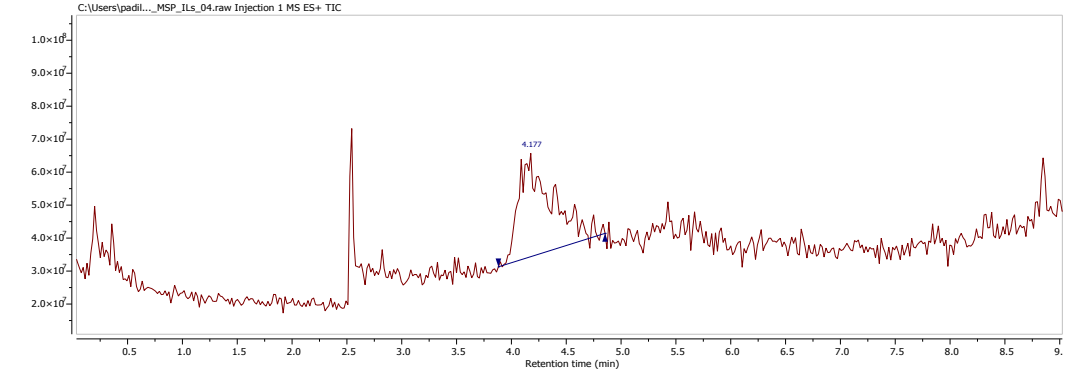

MS (ESI): calculated 1361.38; found 681.6 (m/2).

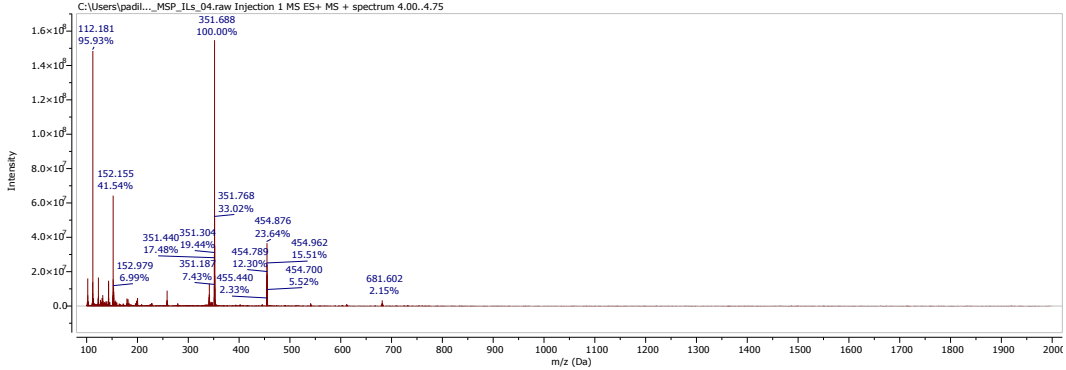

C12-4

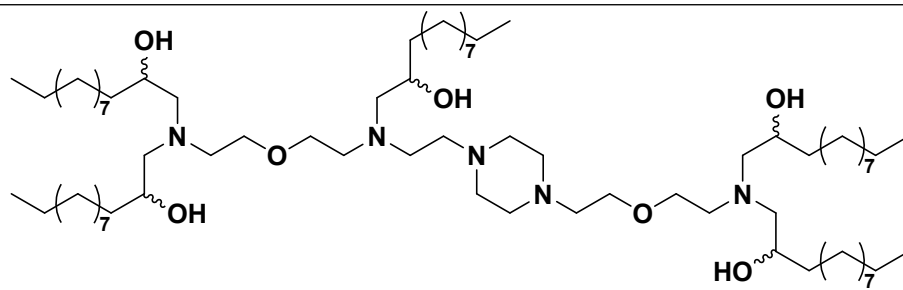

C12-4

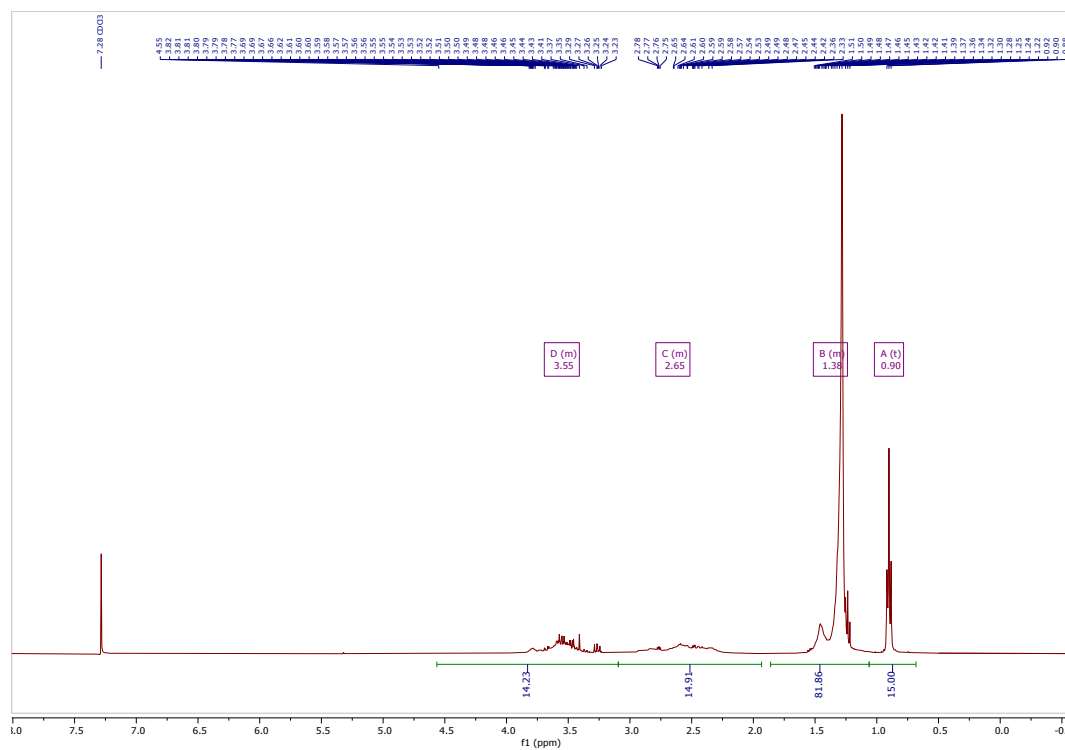

<sup>1</sup>H NMR  
(400  
MHz,  
CDCl<sub>3</sub>) δ  
4.68 –  
3.11 (m,  
14H), 3.12  
– 1.98 (m,  
15H), 1.83  
– 1.06 (m,  
82H), 0.90  
(t, *J* = 6.7  
Hz, 15H).

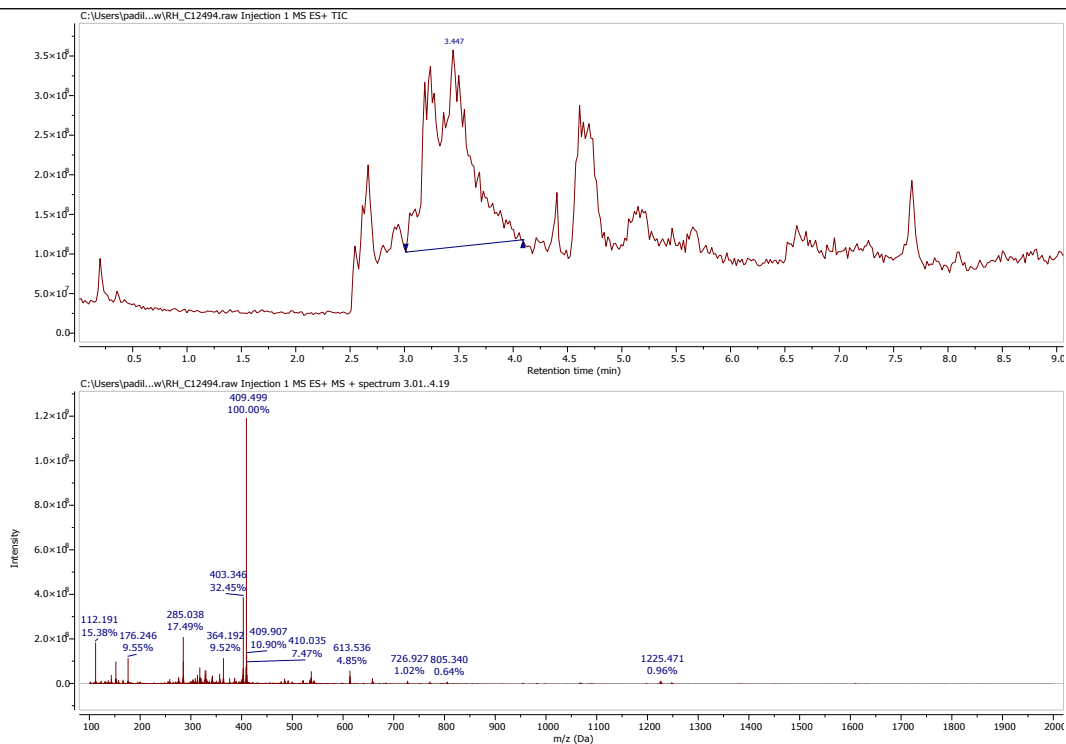

MS (ESI):  
 calculated  
 1225.05;  
 found  
 1225.47.

C12-5

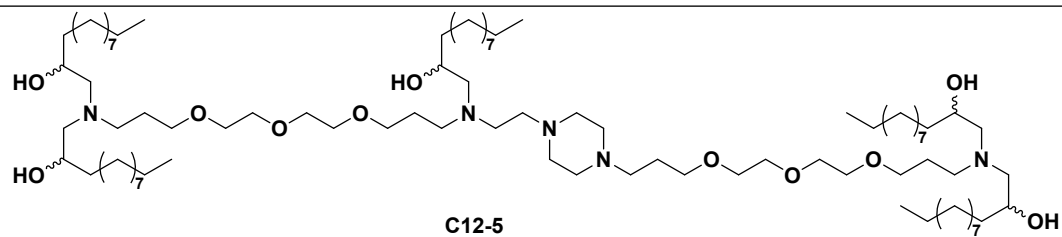





C12-6

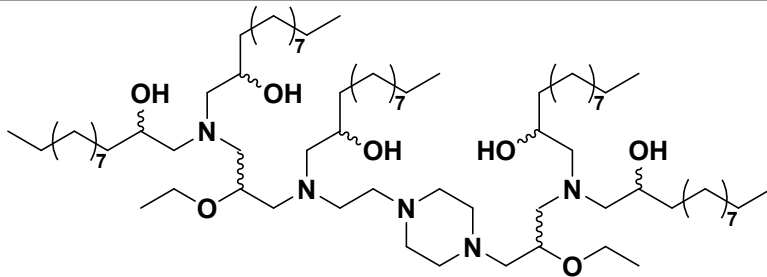

C12-6

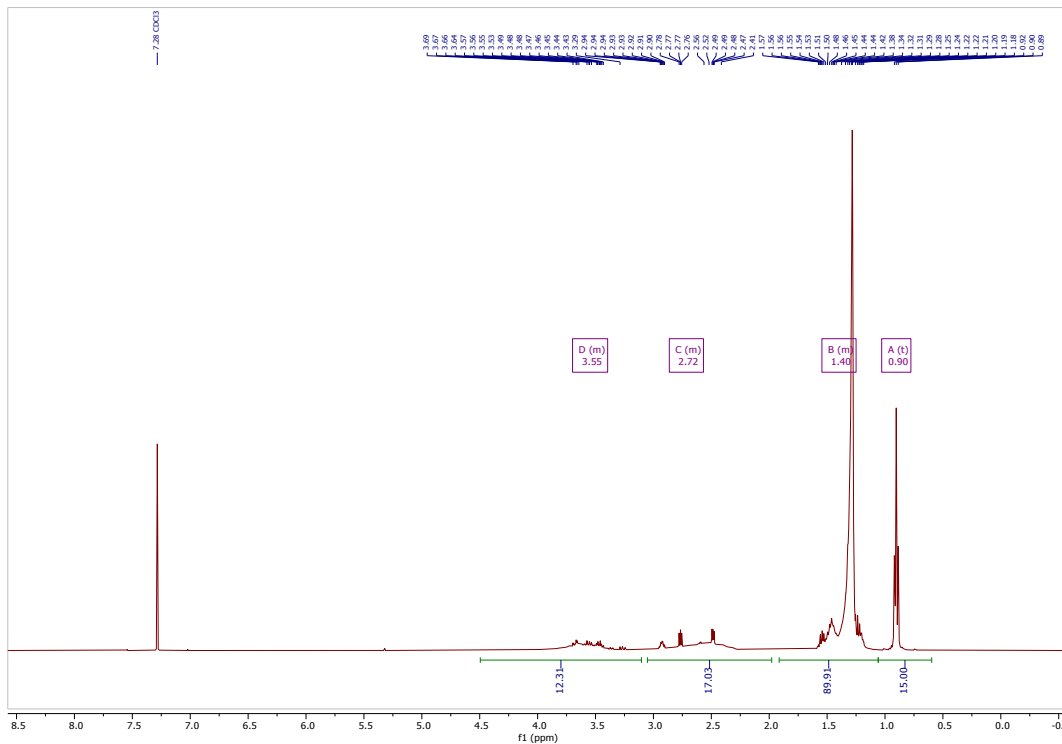

<sup>1</sup>H NMR  
(400  
MHz,  
CDCl<sub>3</sub>) δ  
4.85 –  
3.11 (m,  
12H), 3.16  
– 1.97 (m,  
17H), 1.97  
– 1.03 (m,  
90H), 0.90  
(t, *J* = 6.7  
Hz, 15H).

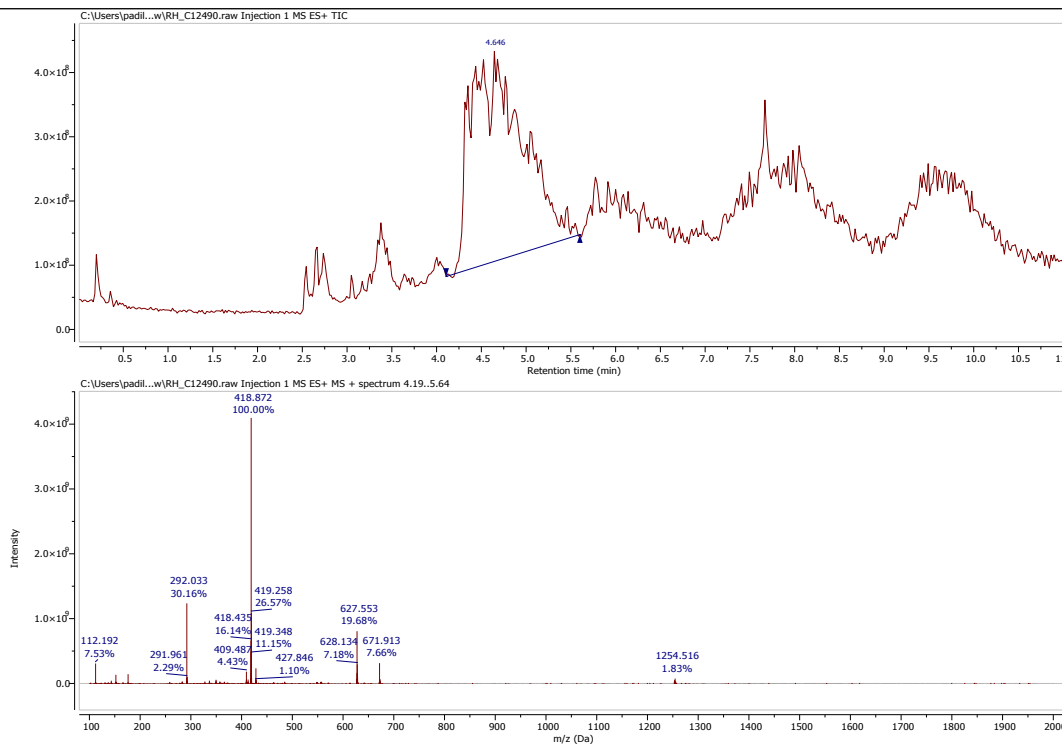

MS (ESI):  
 calculated  
 1253.11;  
 found  
 1254.52.

C12-7

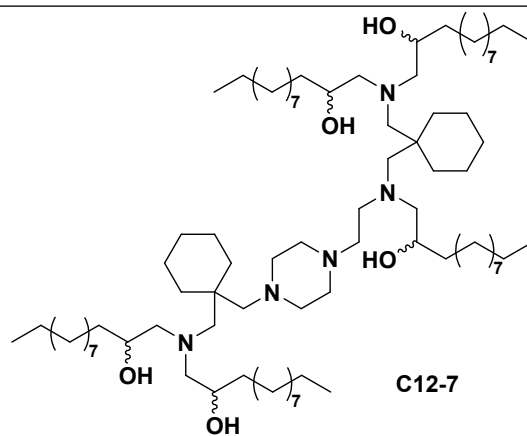

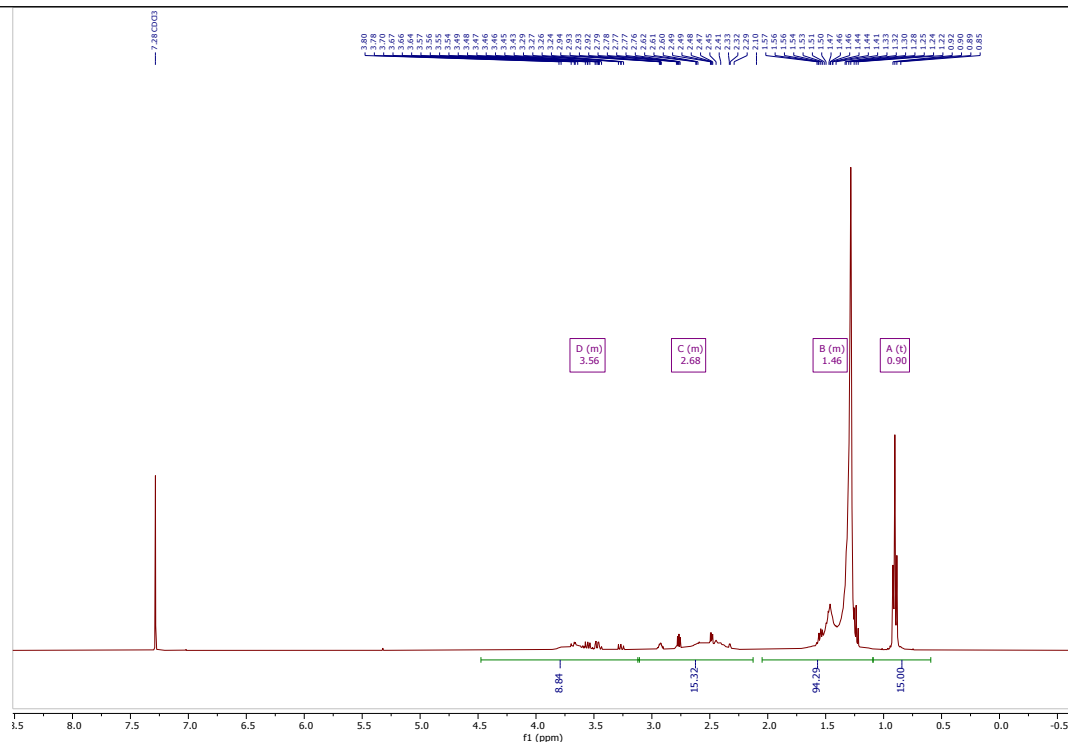

<sup>1</sup>H NMR  
(400 MHz, CDCl<sub>3</sub>) δ  
4.56 – 3.10 (m, 9H), 3.10 – 2.06 (m, 15H), 2.04 – 1.07 (m, 94H), 0.90 (t, *J* = 6.7 Hz, 15H).

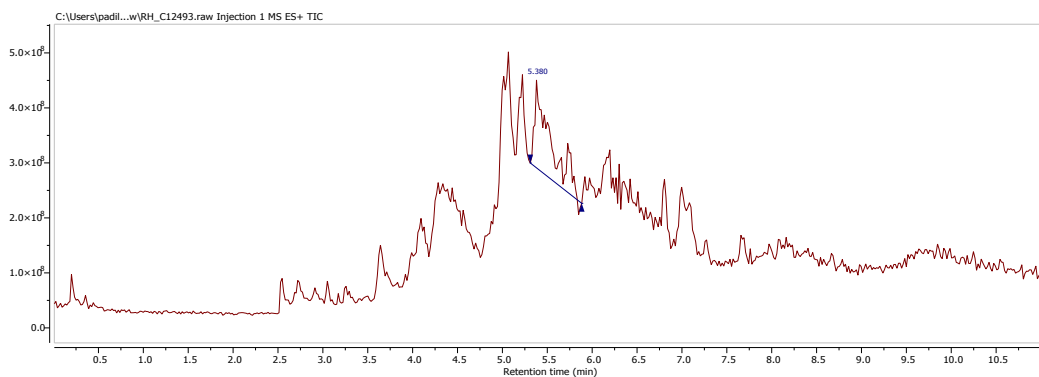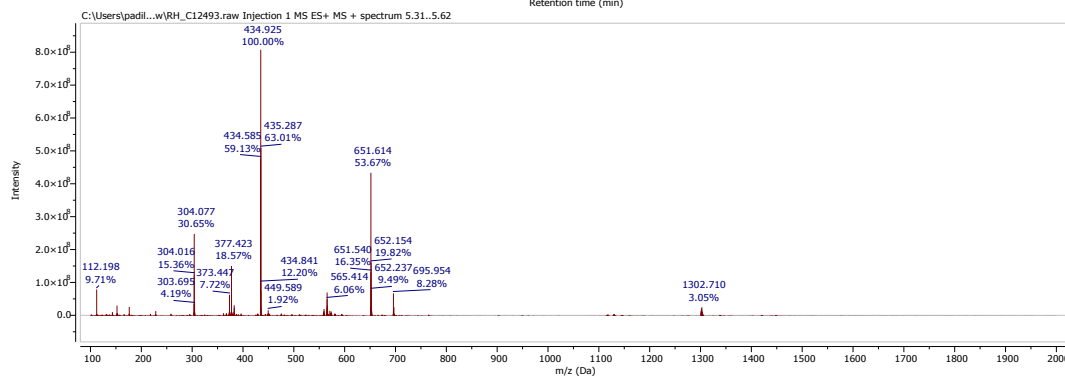

MS (ESI):  
calculated  
1301.24;  
found  
1302.71.

C12-8

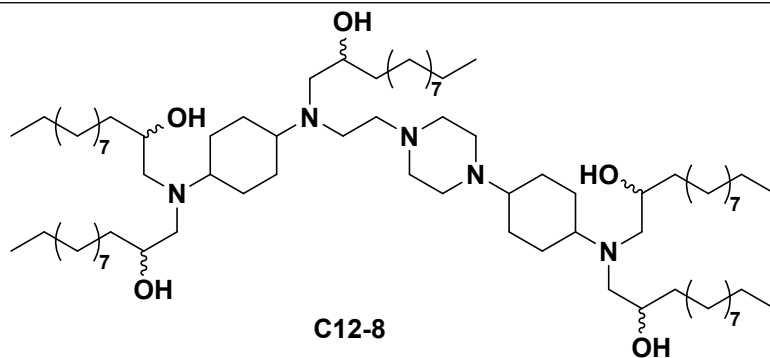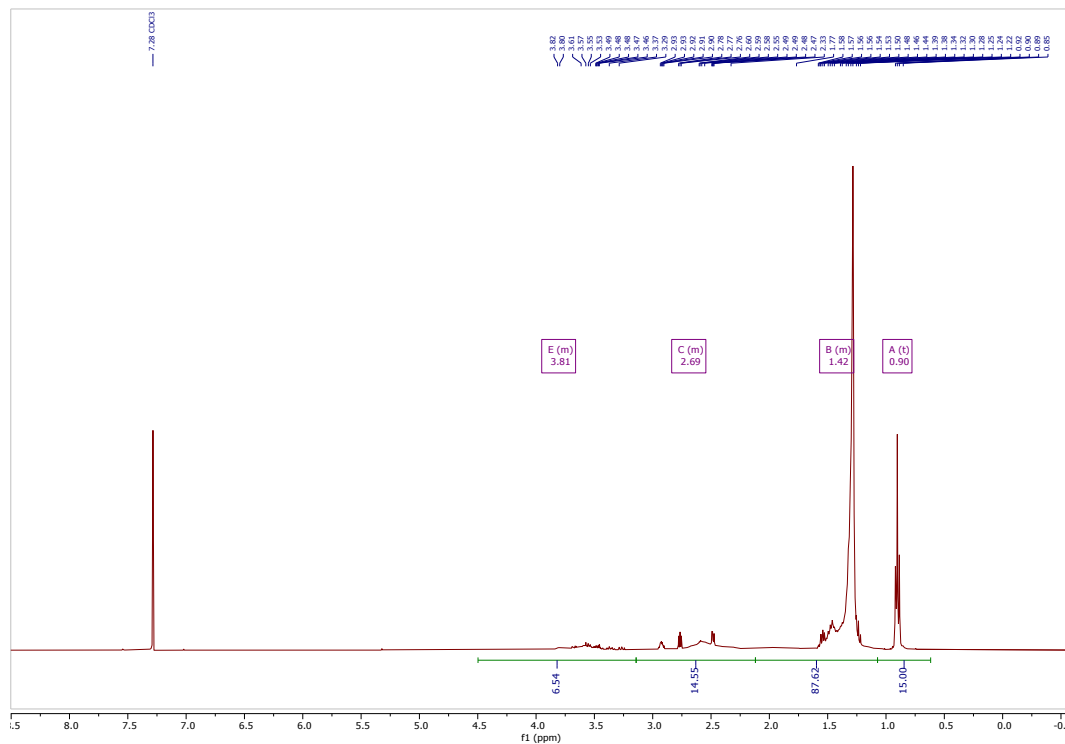

<sup>1</sup>H NMR  
(400  
MHz,  
CDCl<sub>3</sub>) δ  
4.28 –  
3.23 (m,  
6H), 3.14  
– 2.12 (m,  
15H), 2.12  
– 1.05 (m,  
88H), 0.90  
(t, *J* = 6.7  
Hz, 15H).

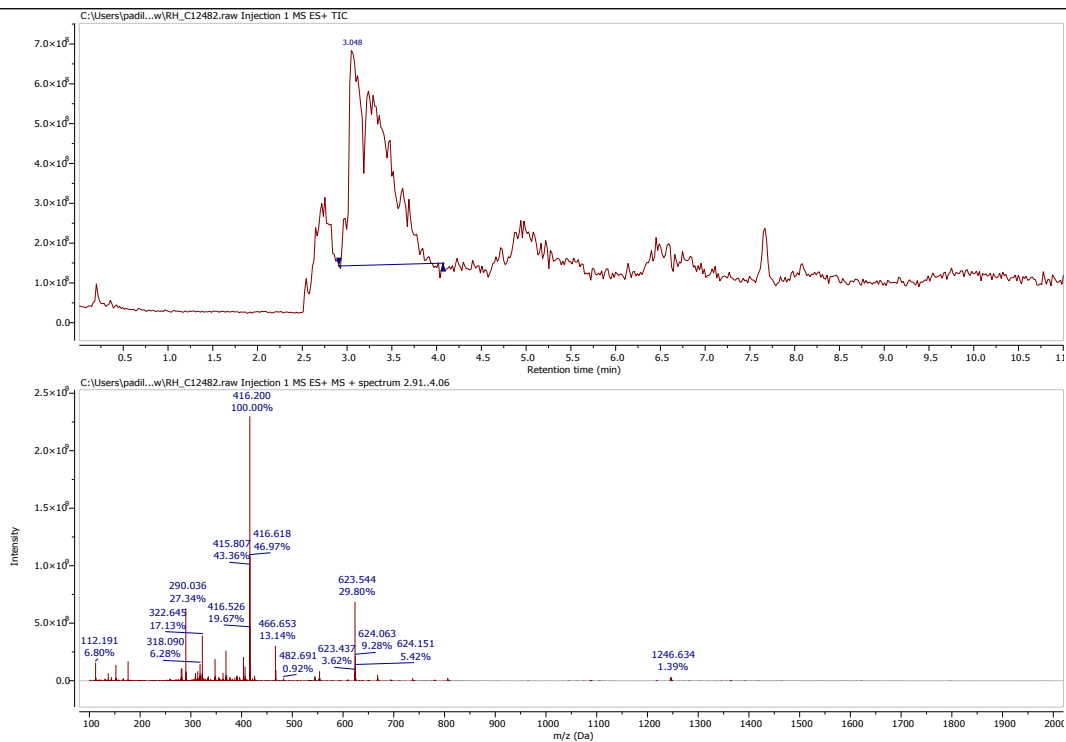

MS (ESI):  
 calculated  
 1244.90;  
 found  
 1246.63.

C14-1

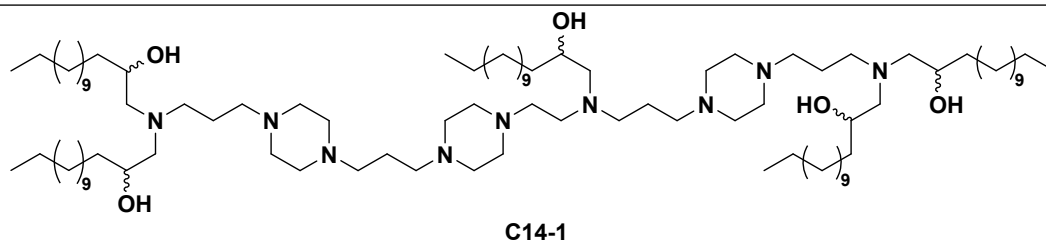

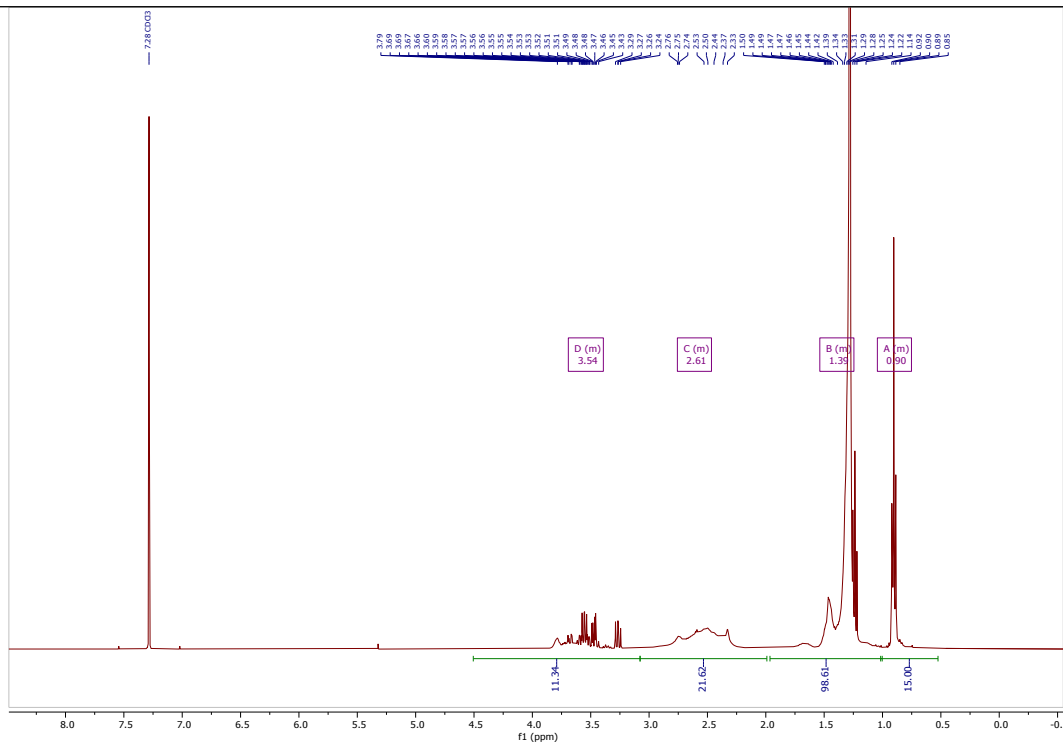

<sup>1</sup>H NMR  
(400  
MHz,  
CDCl<sub>3</sub>) δ  
4.50 –  
3.07 (m,  
11H), 3.04  
– 2.01 (m,  
22H), 1.94  
– 0.99 (m,  
99H), 0.96  
– 0.85 (m,  
15H).

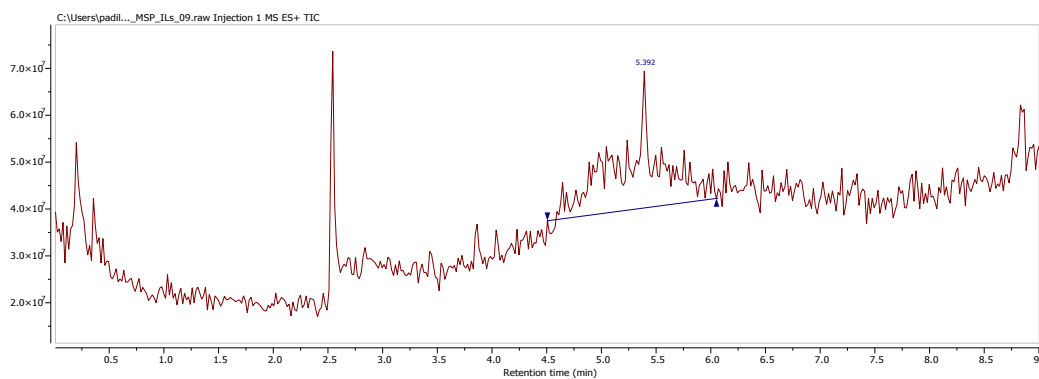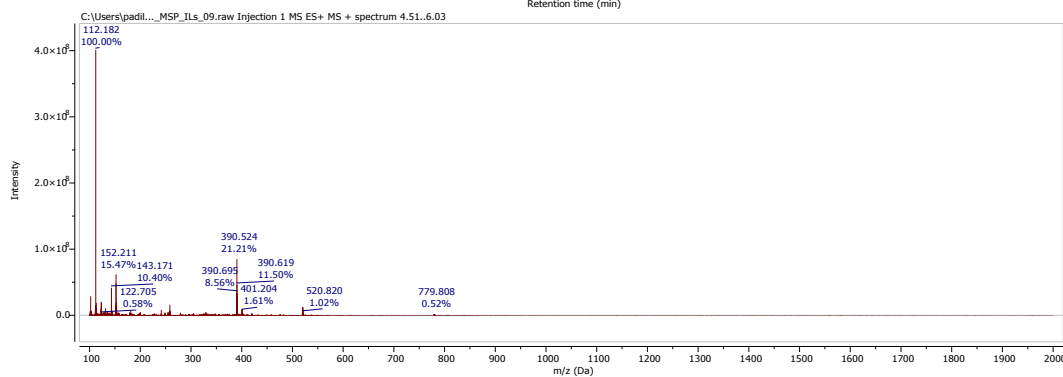

MS (ESI):  
calculated  
1557.66;  
found  
779.81  
(m/2).

C14-2

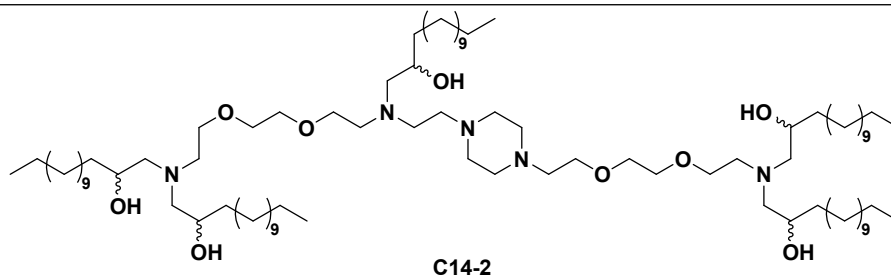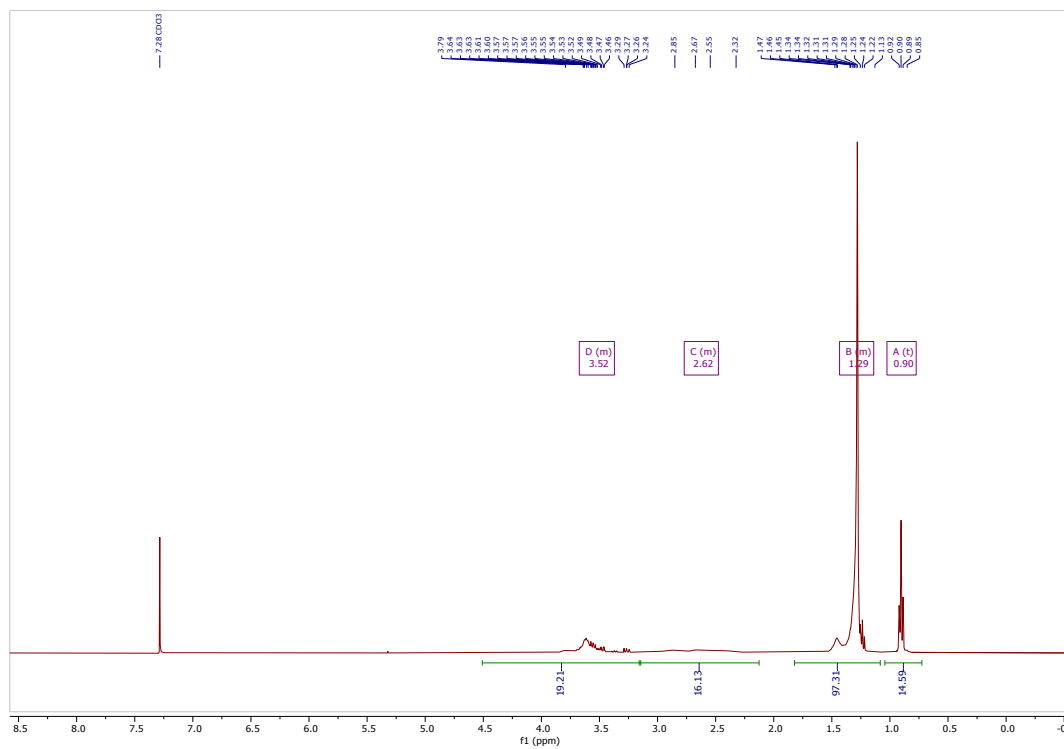

<sup>1</sup>H NMR  
(400  
MHz,  
CDCl<sub>3</sub>) δ  
4.50 –  
3.09 (m,  
19H), 3.11  
– 1.96 (m,  
16H), 1.84  
– 1.08 (m,  
97H), 0.90  
(t, 15H).



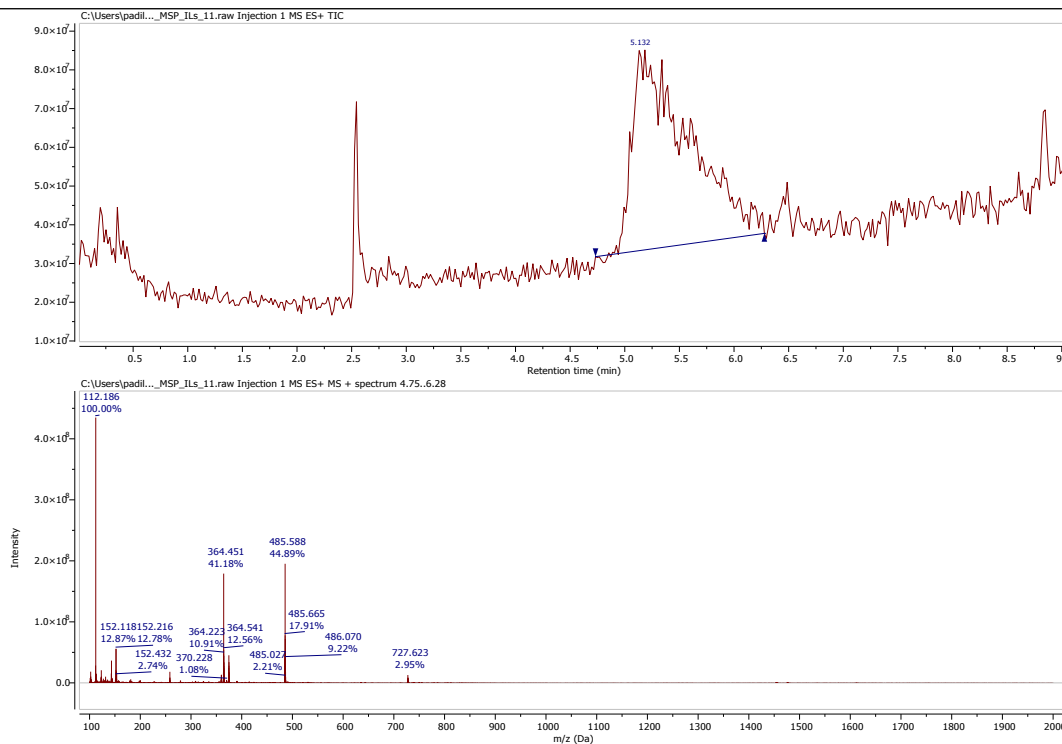

MS (ESI):  
 calculated  
 1453.41;  
 found  
 727.62  
 (m/2).

C14-3

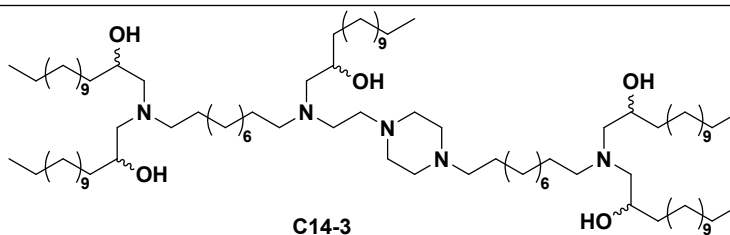

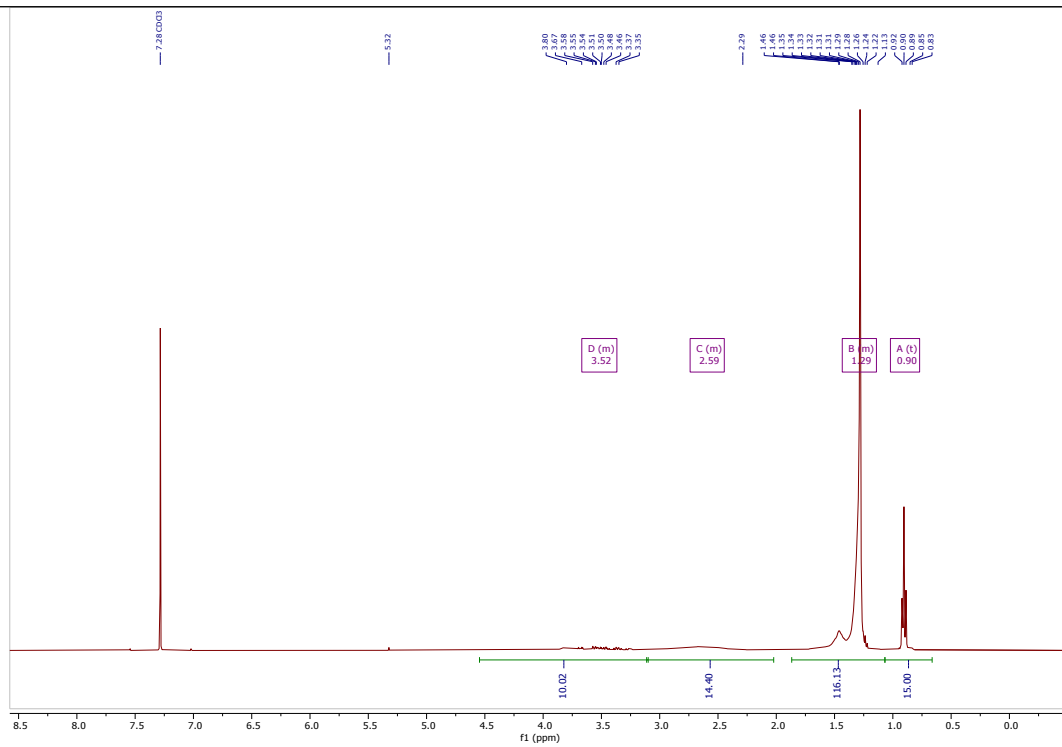

<sup>1</sup>H NMR (400 MHz, CDCl<sub>3</sub>) δ 4.51 – 3.20 (m, 10H), 3.18 – 1.98 (m, 14H), 1.84 – 1.11 (m, 116H), 0.90 (t, 15H).

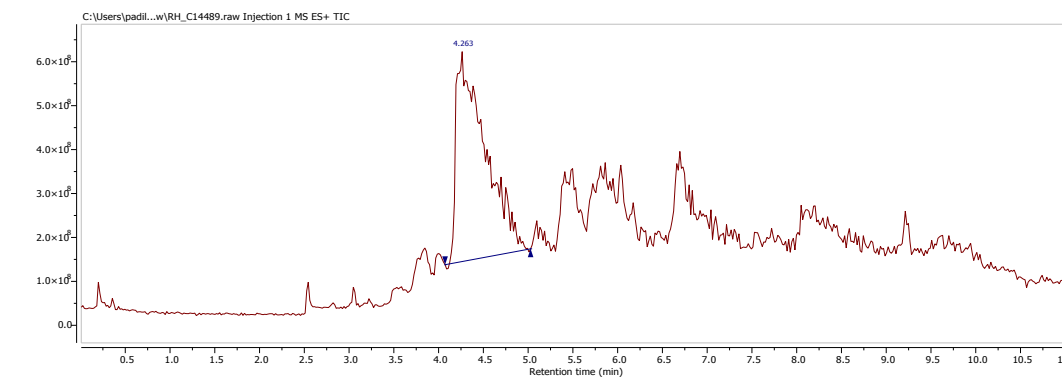

MS (ESI):  
calculated 1501.63;  
found 1502.91.

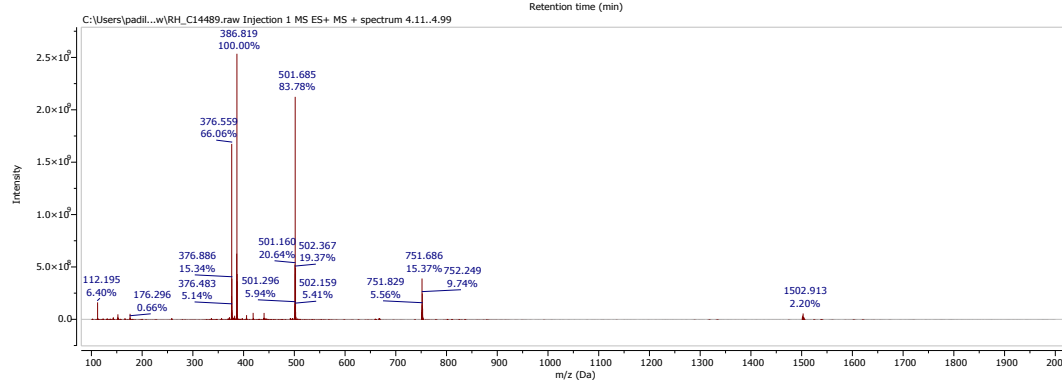

C14-4

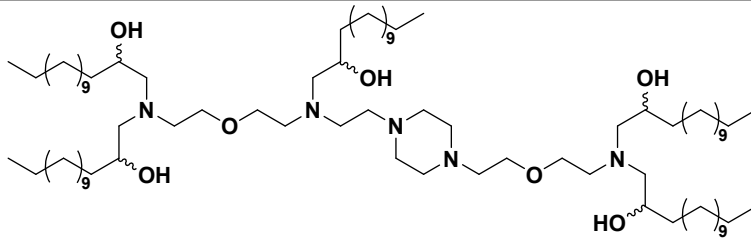

C14-4

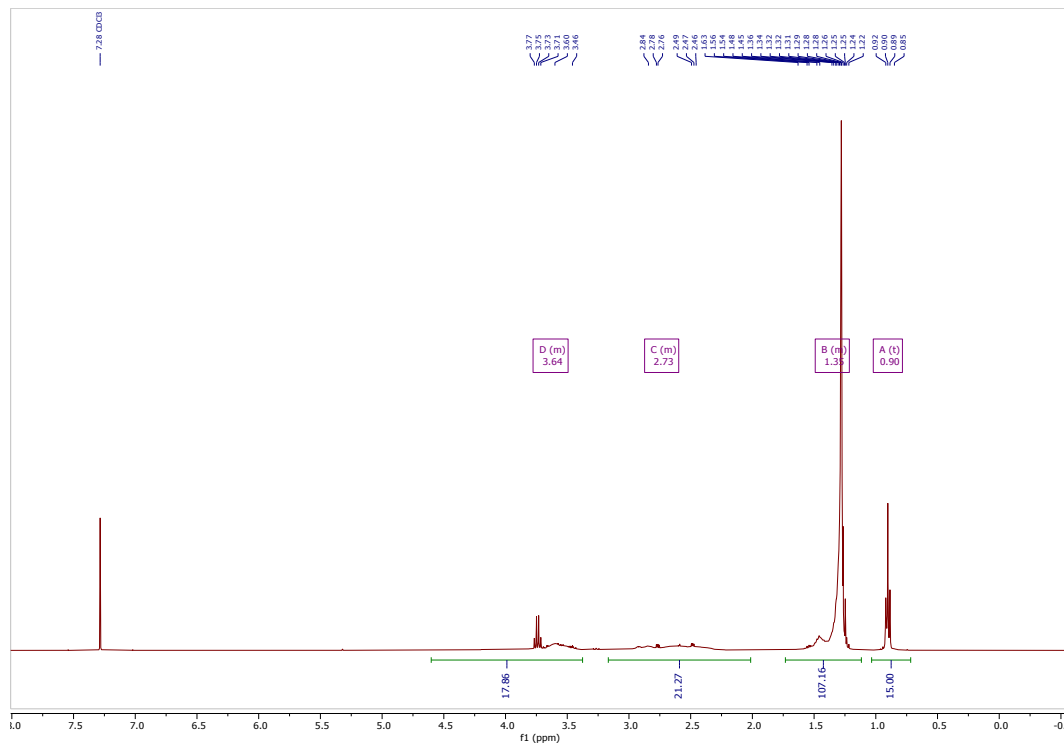

<sup>1</sup>H NMR  
(400  
MHz,  
CDCl<sub>3</sub>) δ  
4.65 –  
3.35 (m,  
18H), 3.13  
– 2.05 (m,  
21H), 1.80  
– 1.09 (m,  
107H),  
0.90 (t, *J*  
= 6.8 Hz,  
15H).

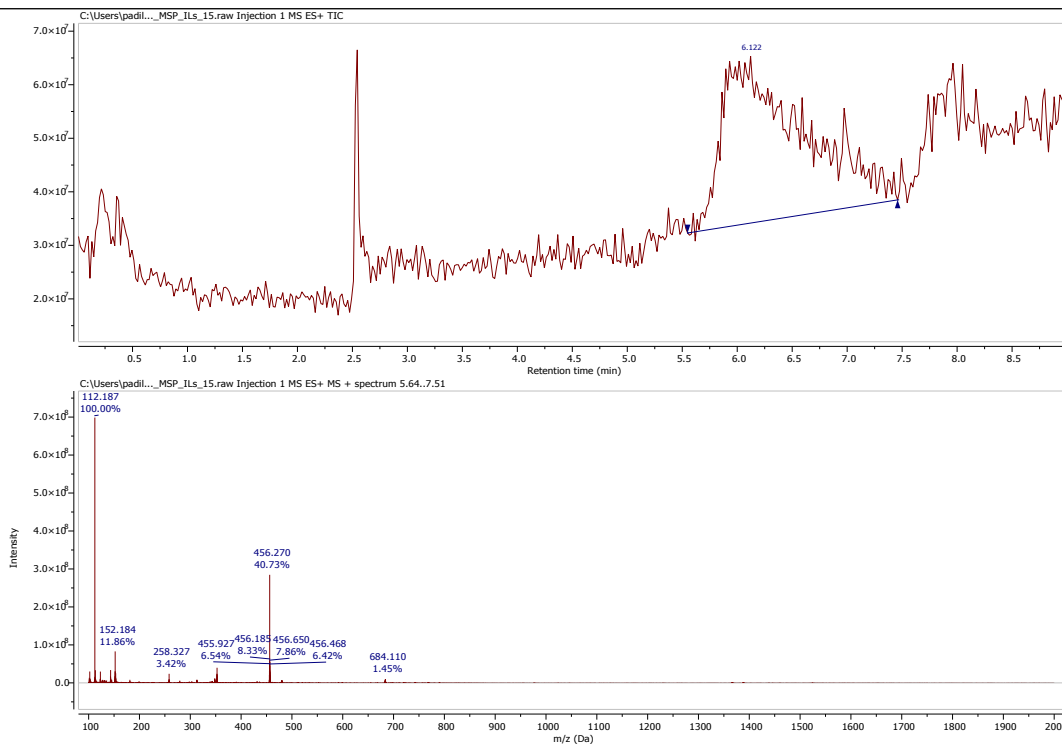

MS (ESI):  
calculated  
1365.30;  
found  
684.11  
(m/2).

C14-5

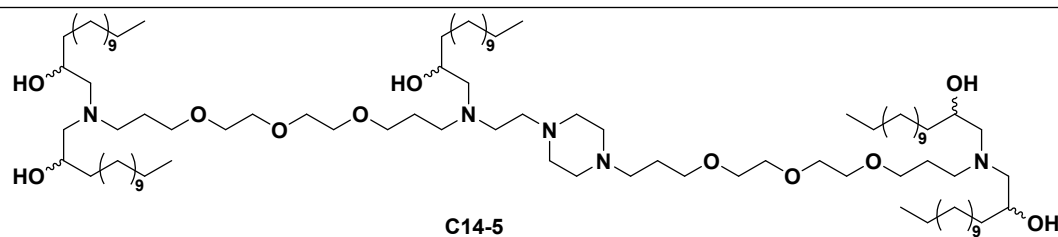

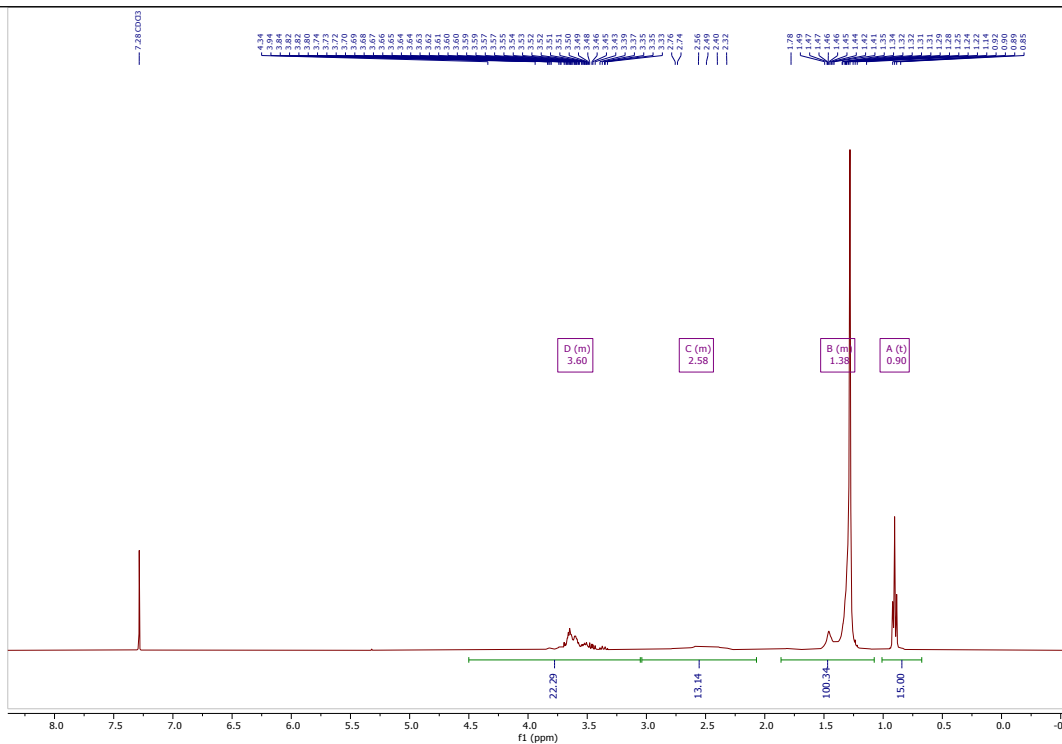

$^1\text{H}$  NMR  
(400 MHz,  $\text{CDCl}_3$ )  $\delta$   
4.63 –  
3.10 (m, 22H), 3.05 – 2.04 (m, 13H), 2.04 – 0.98 (m, 100H), 0.90 (t,  $J = 6.8$  Hz, 15H).

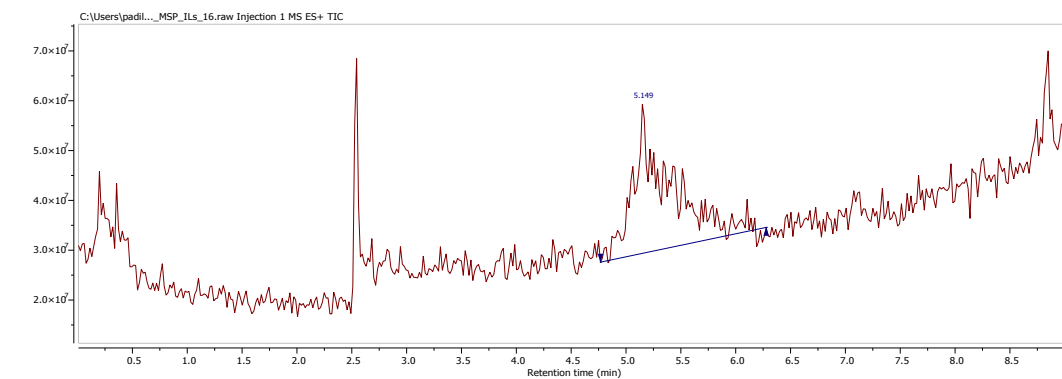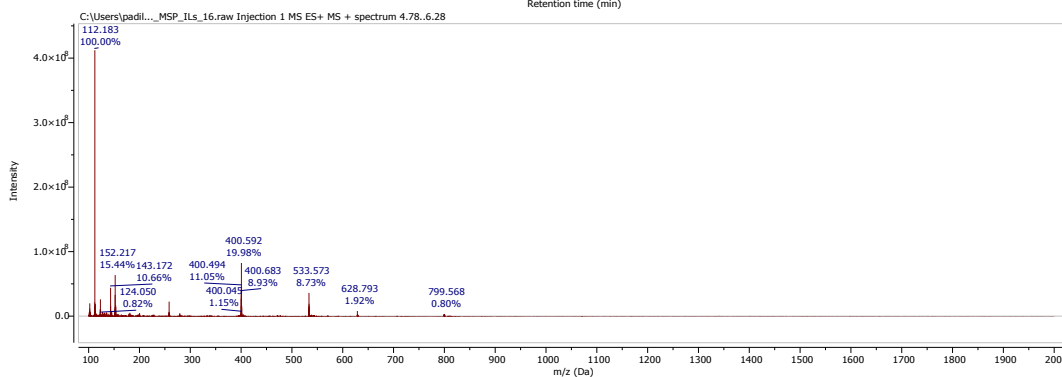

MS (ESI):  
calculated  
1597.62;  
found  
799.57  
(m/2).

C14-6

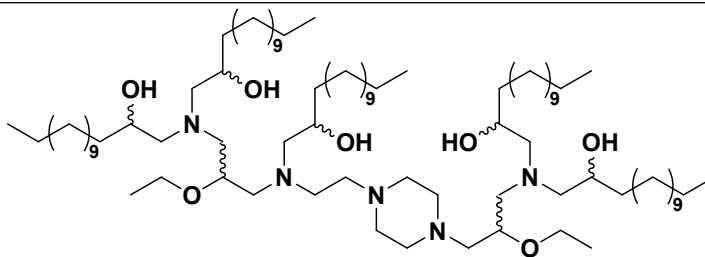

C14-6

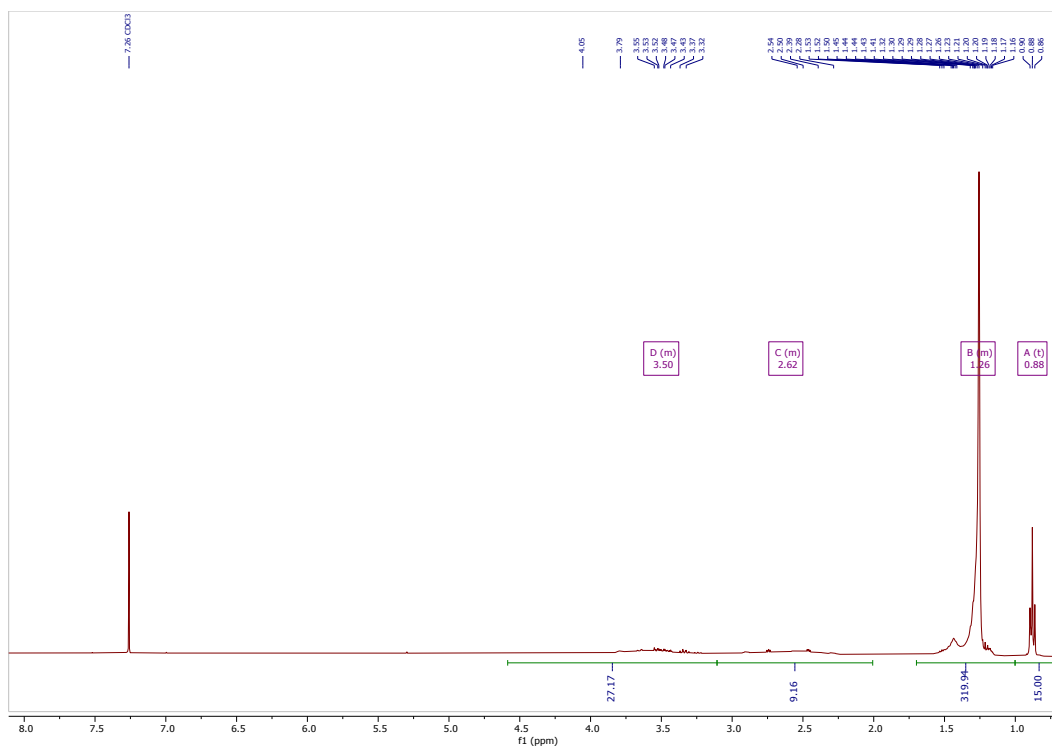

<sup>1</sup>H NMR  
(400  
MHz,  
CDCl<sub>3</sub>) δ  
4.34 –  
3.14 (m,  
27H), 3.14  
– 2.03 (m,  
9H), 1.70  
– 1.03 (m,  
320H),  
0.88 (t, *J*  
= 6.7 Hz,  
15H).

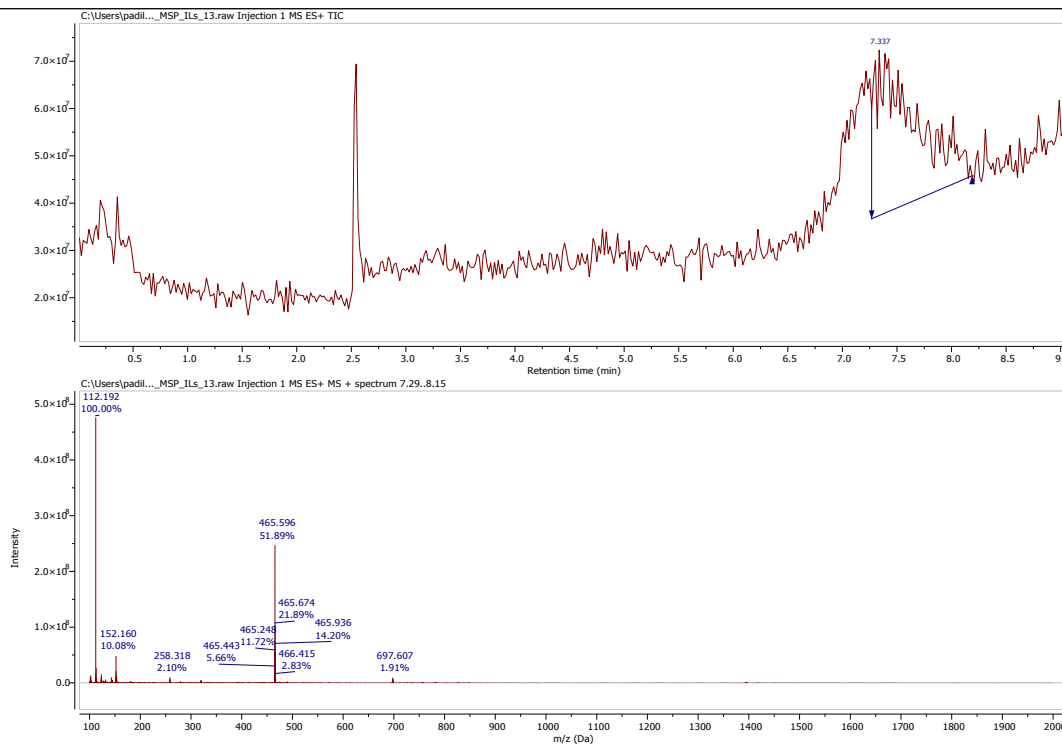

MS (ESI):  
 calculated  
 1393.36;  
 found  
 697.61  
 (m/2).

C14-7

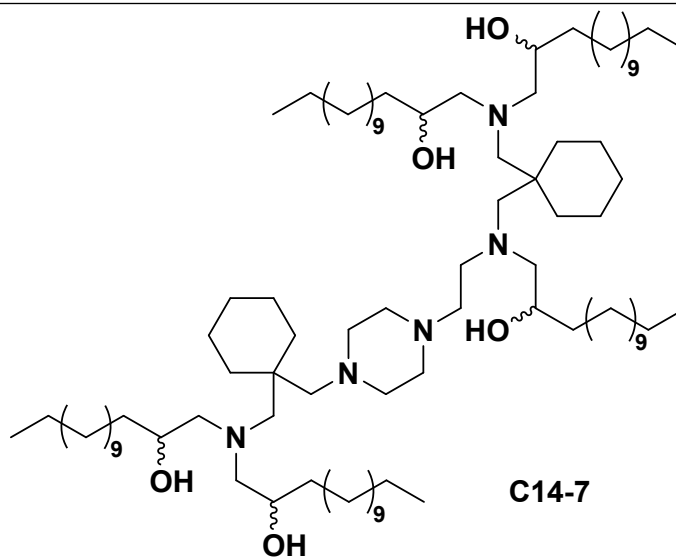

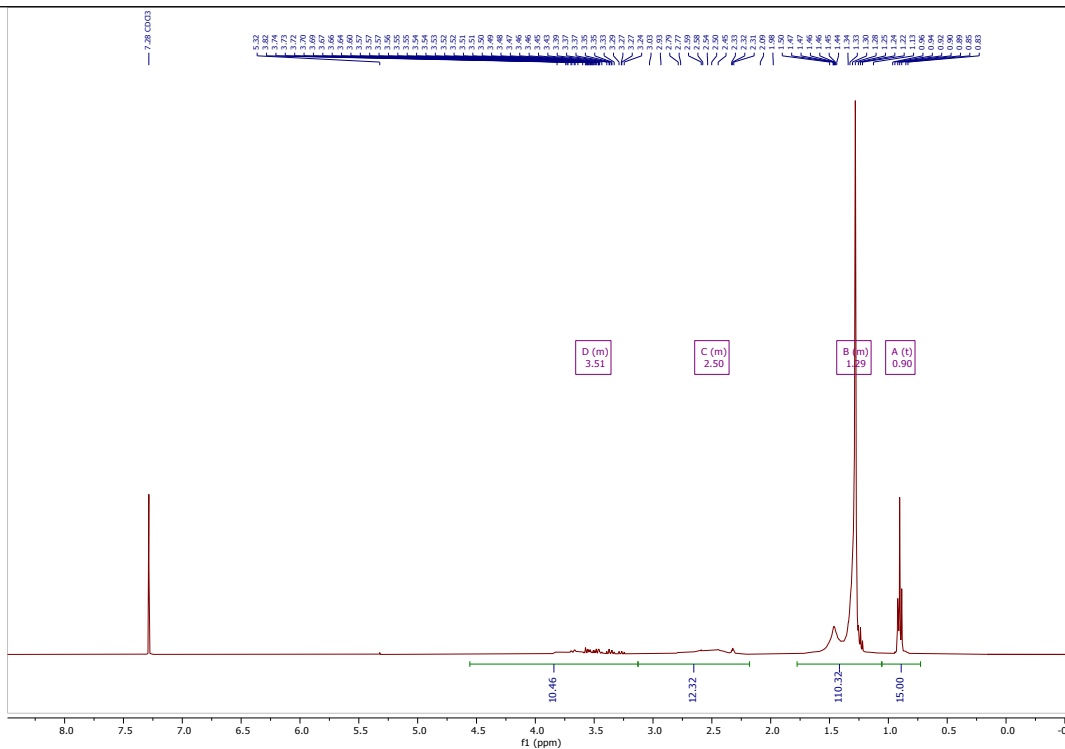

$^1\text{H}$  NMR  
 (400  
 MHz,  
 $\text{CDCl}_3$ )  $\delta$   
 3.98 –  
 3.05 (m,  
 10H), 3.12  
 – 2.14 (m,  
 12H), 1.73  
 – 1.02 (m,  
 110H),  
 0.90 (t,  
 15H).

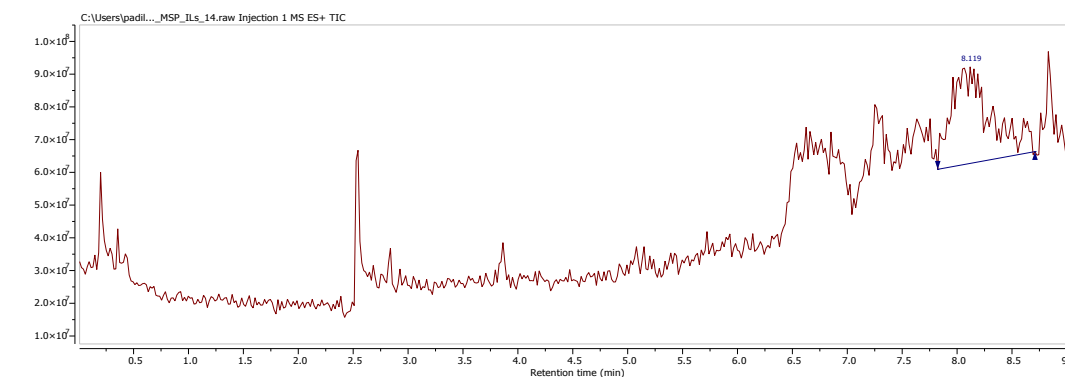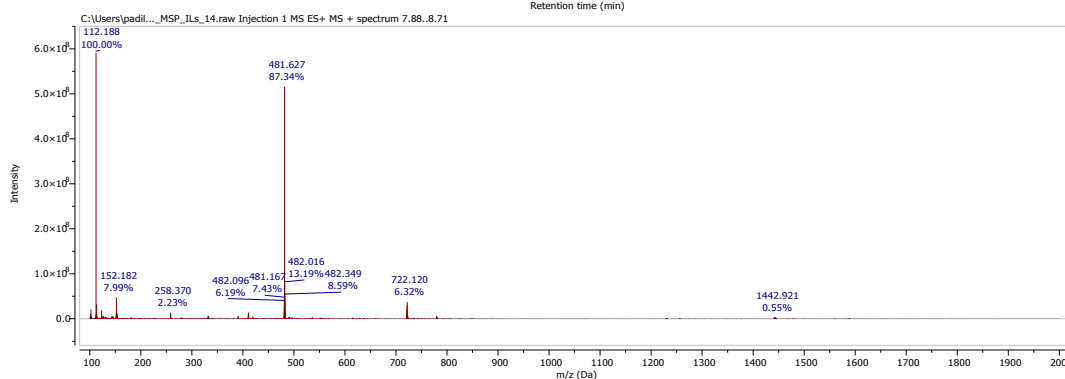

MS (ESI):  
 calculated  
 1441.49;  
 found  
 1442.91.



C14-8

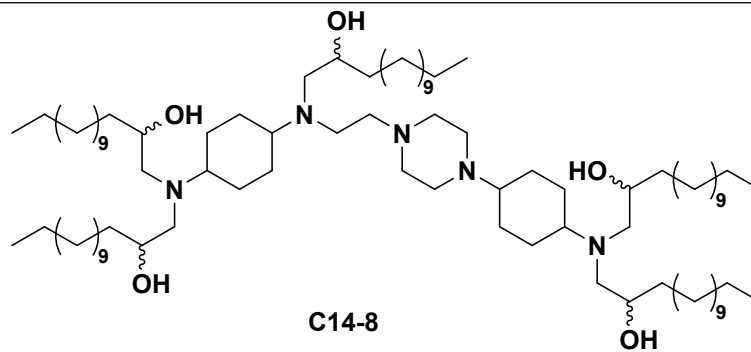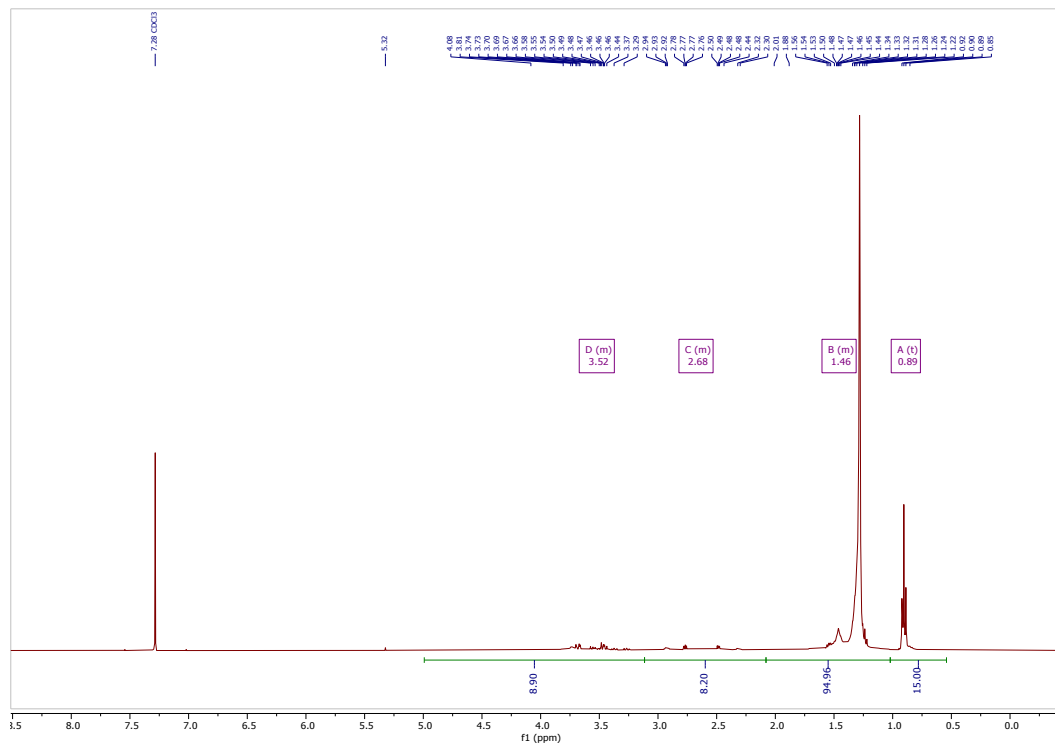

<sup>1</sup>H NMR  
(400  
MHz,  
CDCl<sub>3</sub>) δ  
5.02 –  
3.13 (m,  
9H), 3.14  
– 2.12 (m,  
8H), 2.08  
– 1.03 (m,  
95H), 0.89  
(t, 15H).

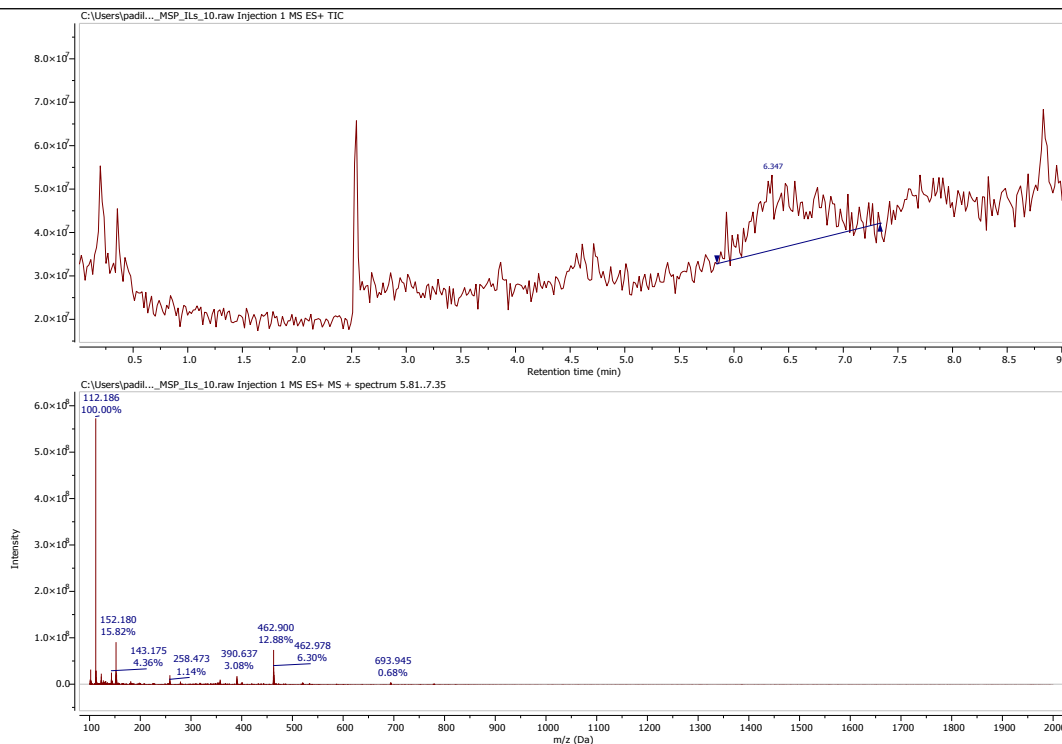

MS (ESI):  
calculated  
1385.15;  
found  
693.95  
(m/2).

C16-1

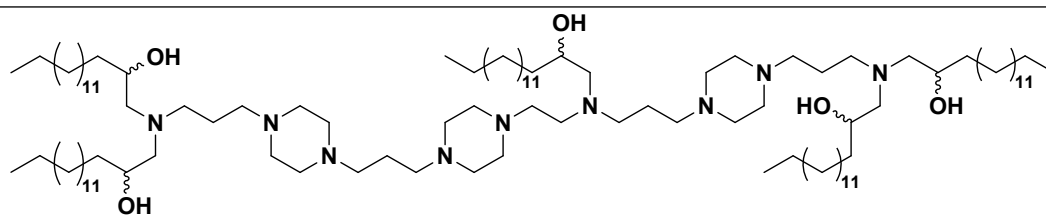

C16-1

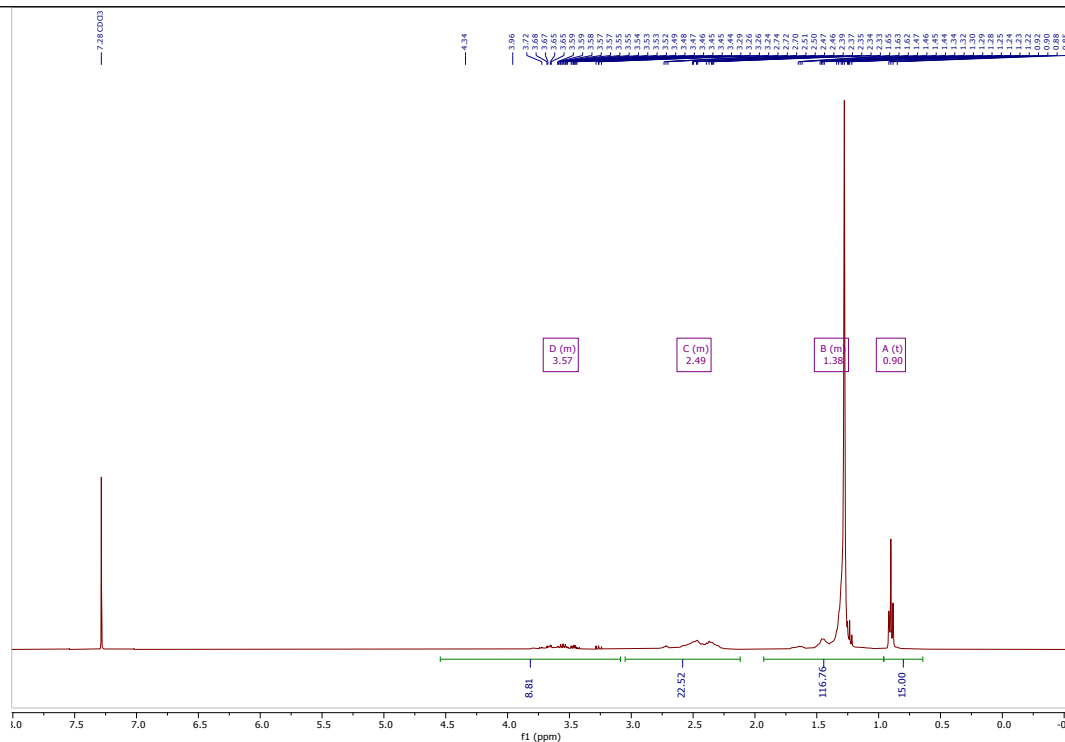

$^1\text{H}$  NMR  
(400  
MHz,  
 $\text{CDCl}_3$ )  $\delta$   
4.55 –  
3.12 (m,  
9H), 3.01  
– 2.05 (m,  
23H), 1.79  
– 1.05 (m,  
117H),  
0.90 (t,  
15H).

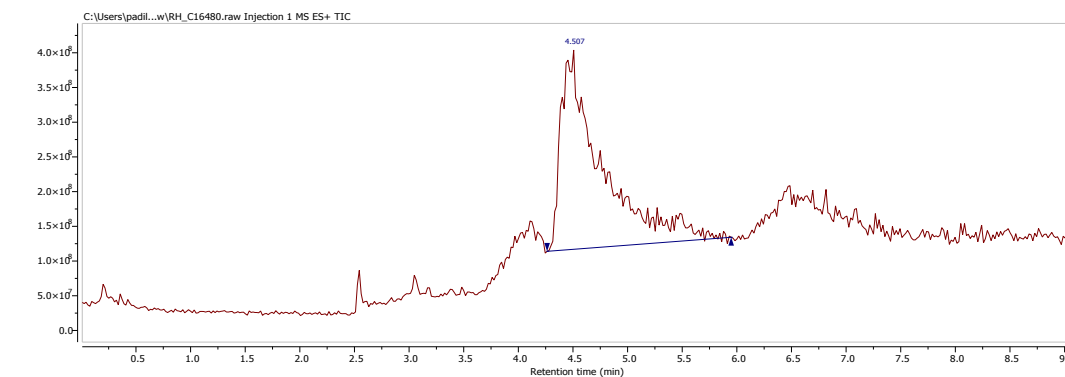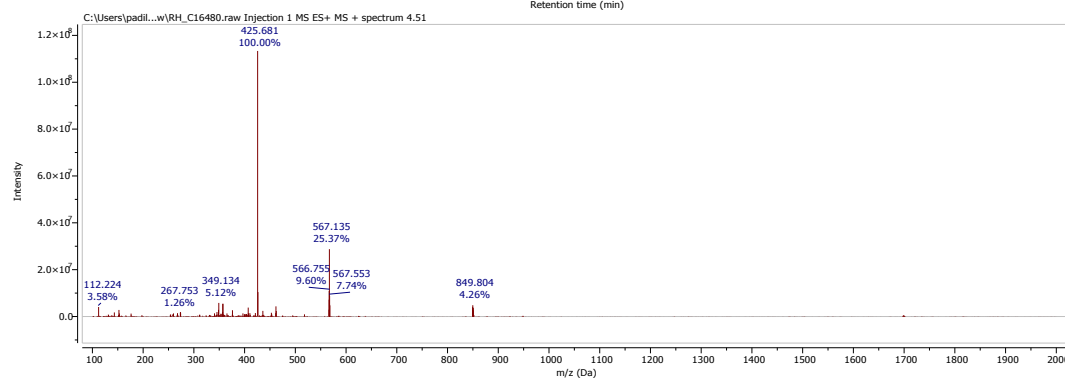

MS (ESI):  
calculated  
1697.91;  
found  
849.80  
(m/2).

C16-2

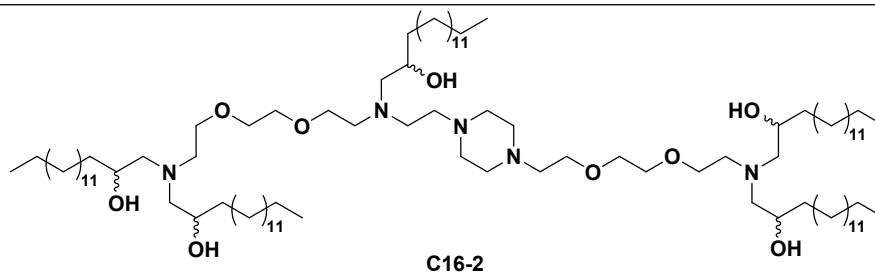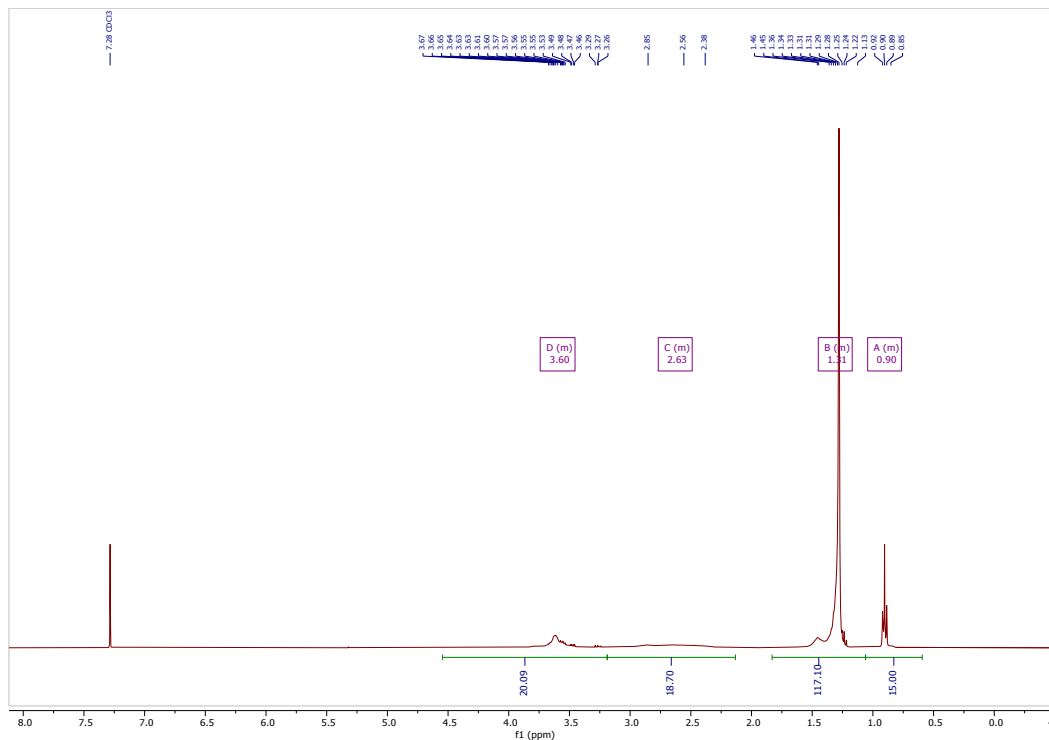

<sup>1</sup>H NMR  
(400  
MHz,  
CDCl<sub>3</sub>) δ  
4.53 –  
3.17 (m,  
20H), 3.09  
– 2.12 (m,  
19H), 1.71  
– 1.04 (m,  
117H),  
1.08 –  
0.65 (m,  
15H).

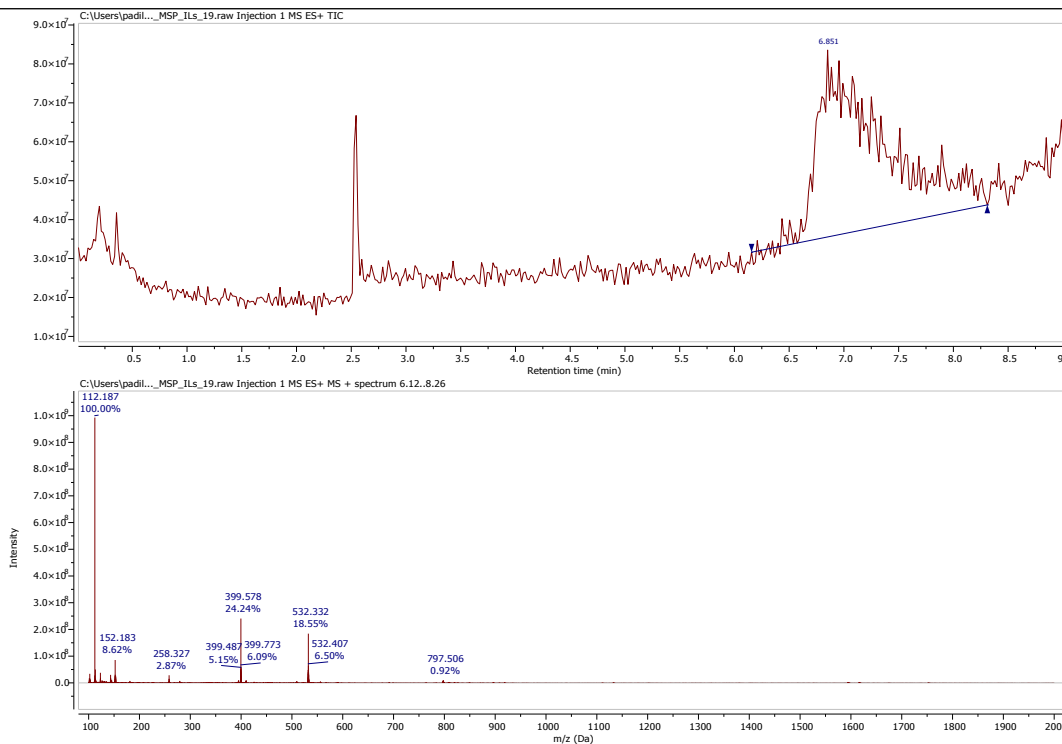

MS (ESI):  
 calculated  
 1593.66 ;  
 found  
 797.51  
 (m/2).

C16-3

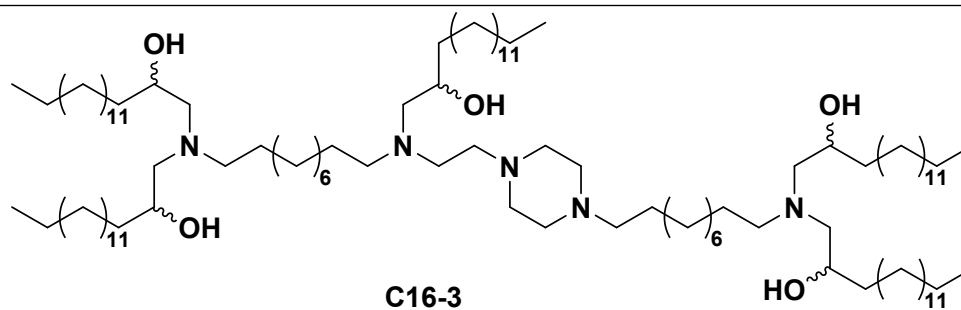



C16-4

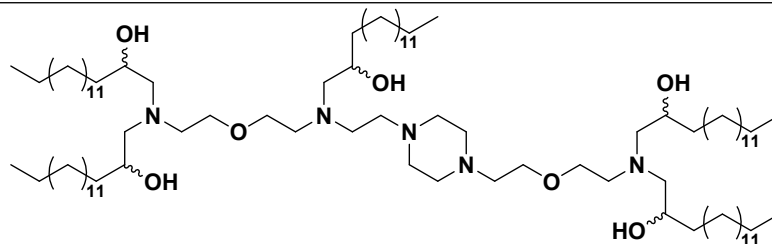

C16-4

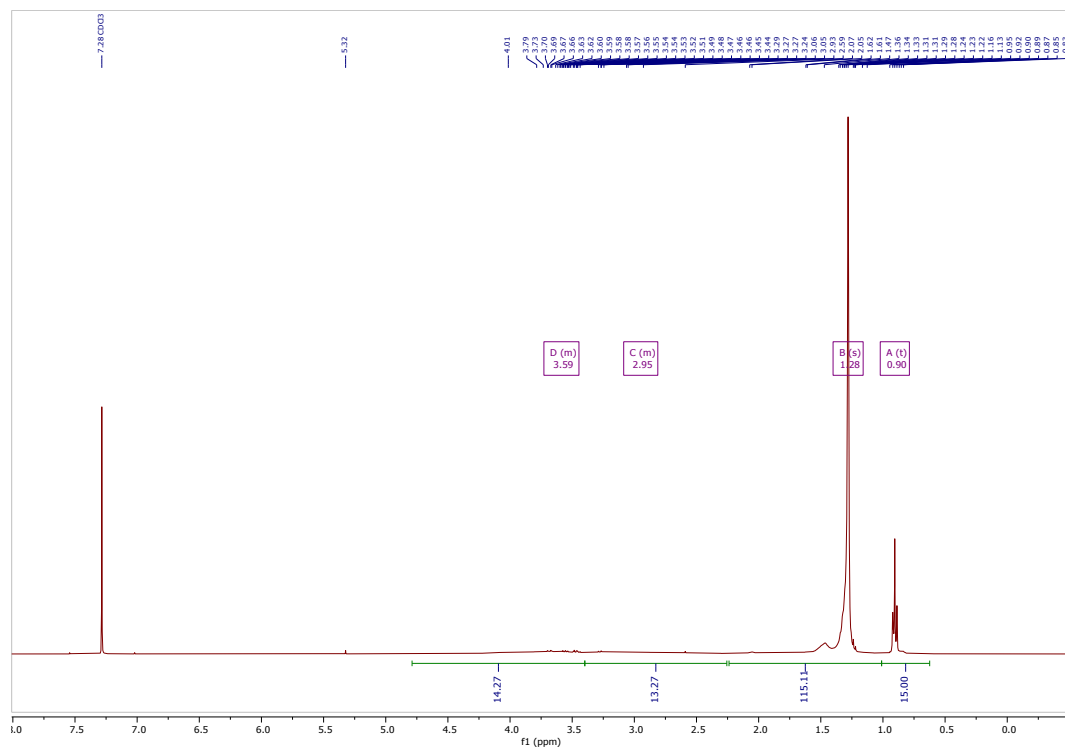

<sup>1</sup>H NMR  
(400  
MHz,  
CDCl<sub>3</sub>) δ  
4.54 –  
3.42 (m,  
14H), 3.36  
– 2.27 (m,  
13H), 1.28  
(s, 115H),  
0.90 (t,  
15H).

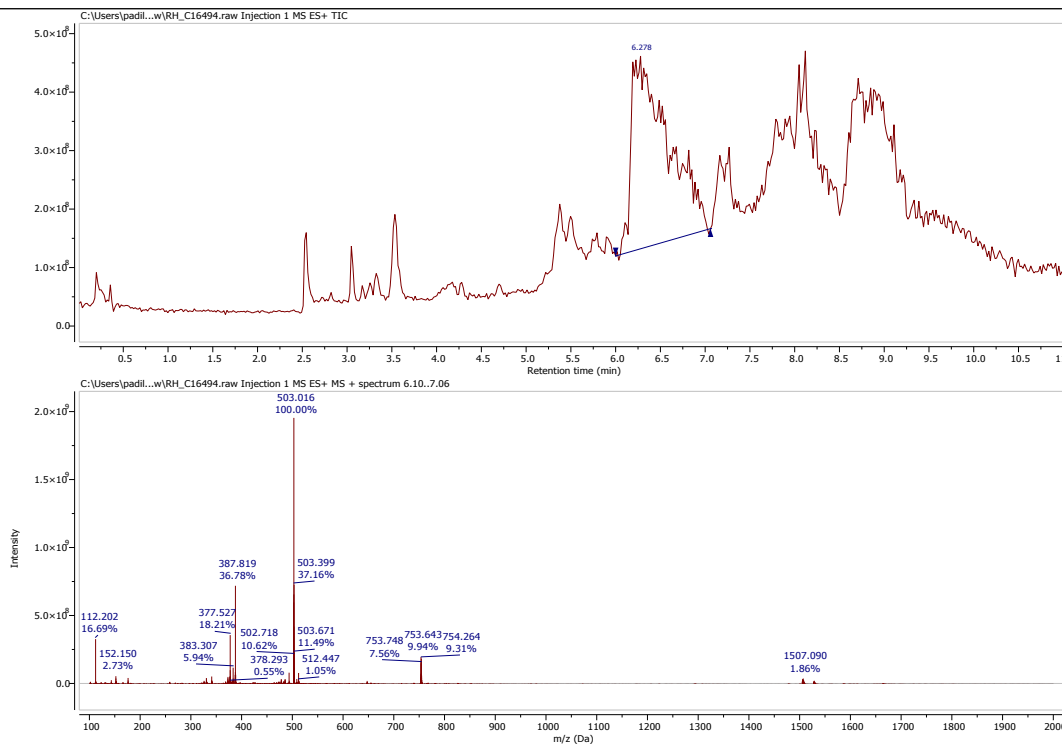

MS (ESI):  
 calculated  
 1505.55;  
 found  
 1507.09.

C16-5

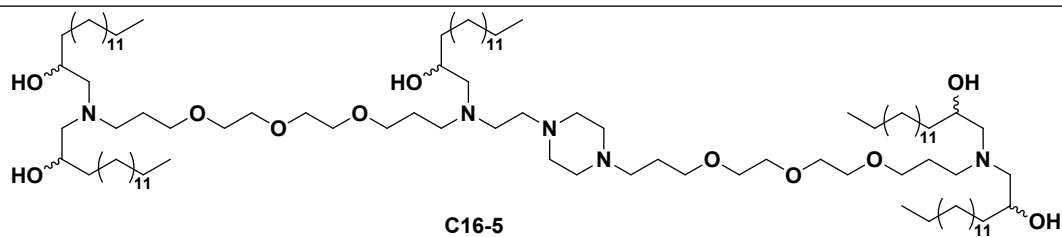





C16-6

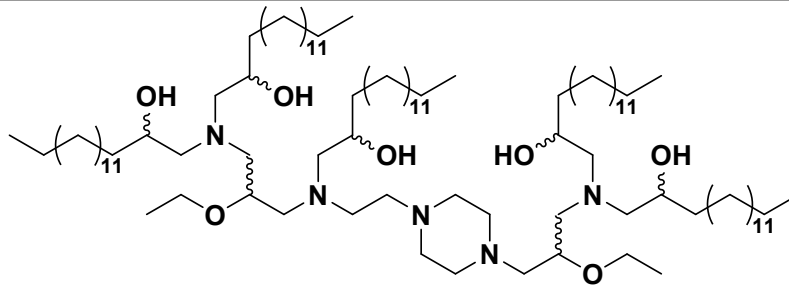

C16-6

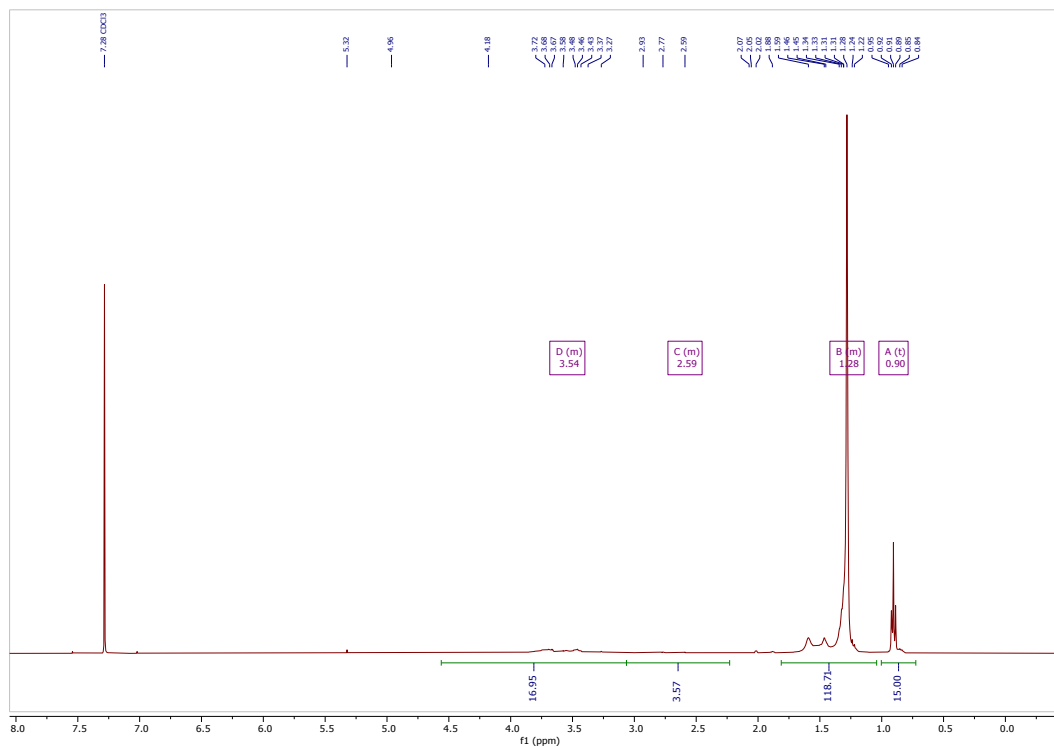

<sup>1</sup>H NMR  
(400  
MHz,  
CDCl<sub>3</sub>) δ  
4.55 –  
3.07 (m,  
17H), 3.07  
– 2.15 (m,  
4H), 1.73  
– 1.07 (m,  
119H),  
0.90 (t, *J*  
= 6.8 Hz,  
15H).

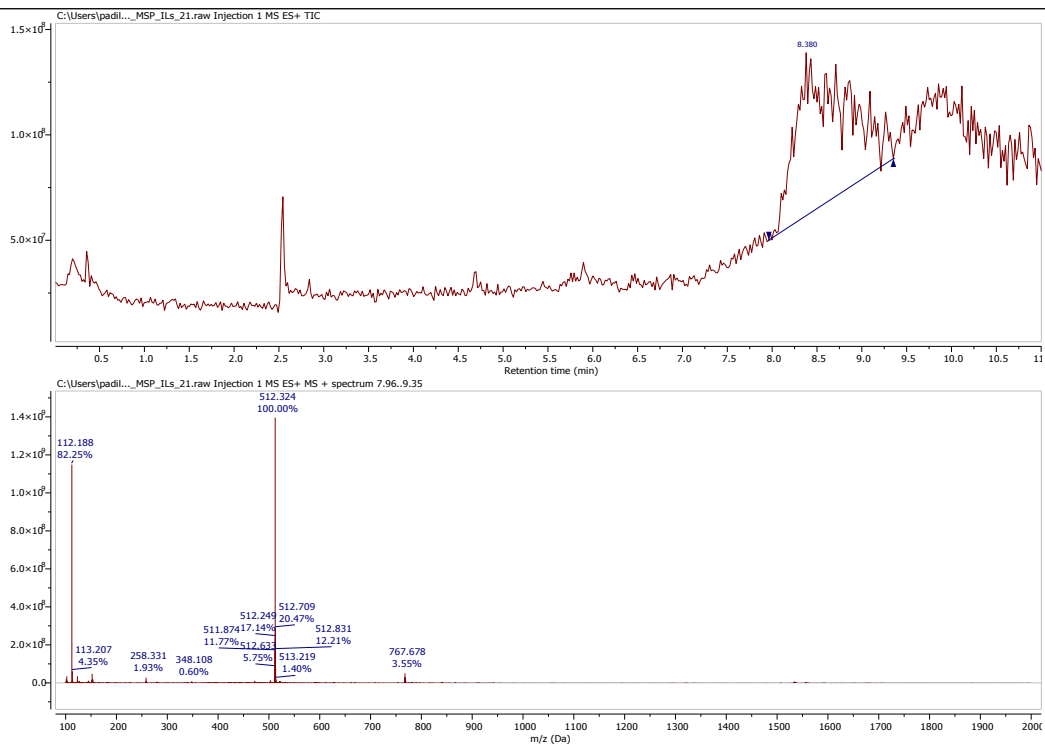

MS (ESI):  
 calculated  
 1533.61;  
 found  
 767.68  
 (m/2).

C16-7

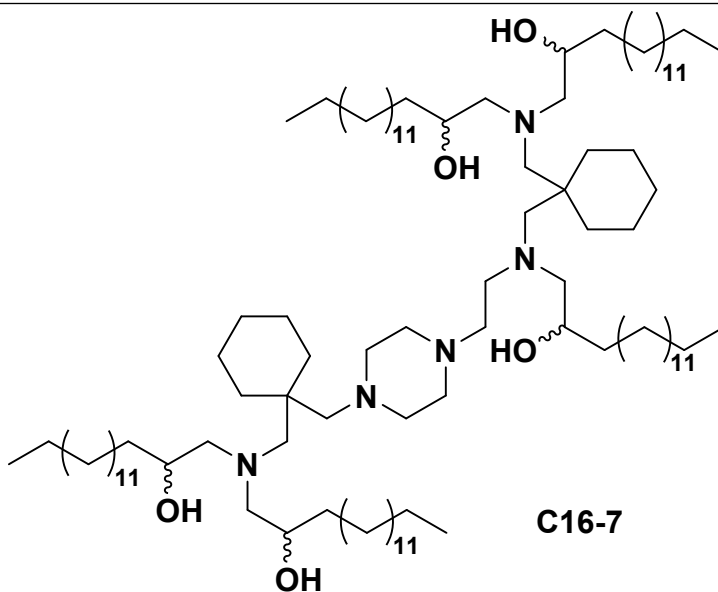

C16-7





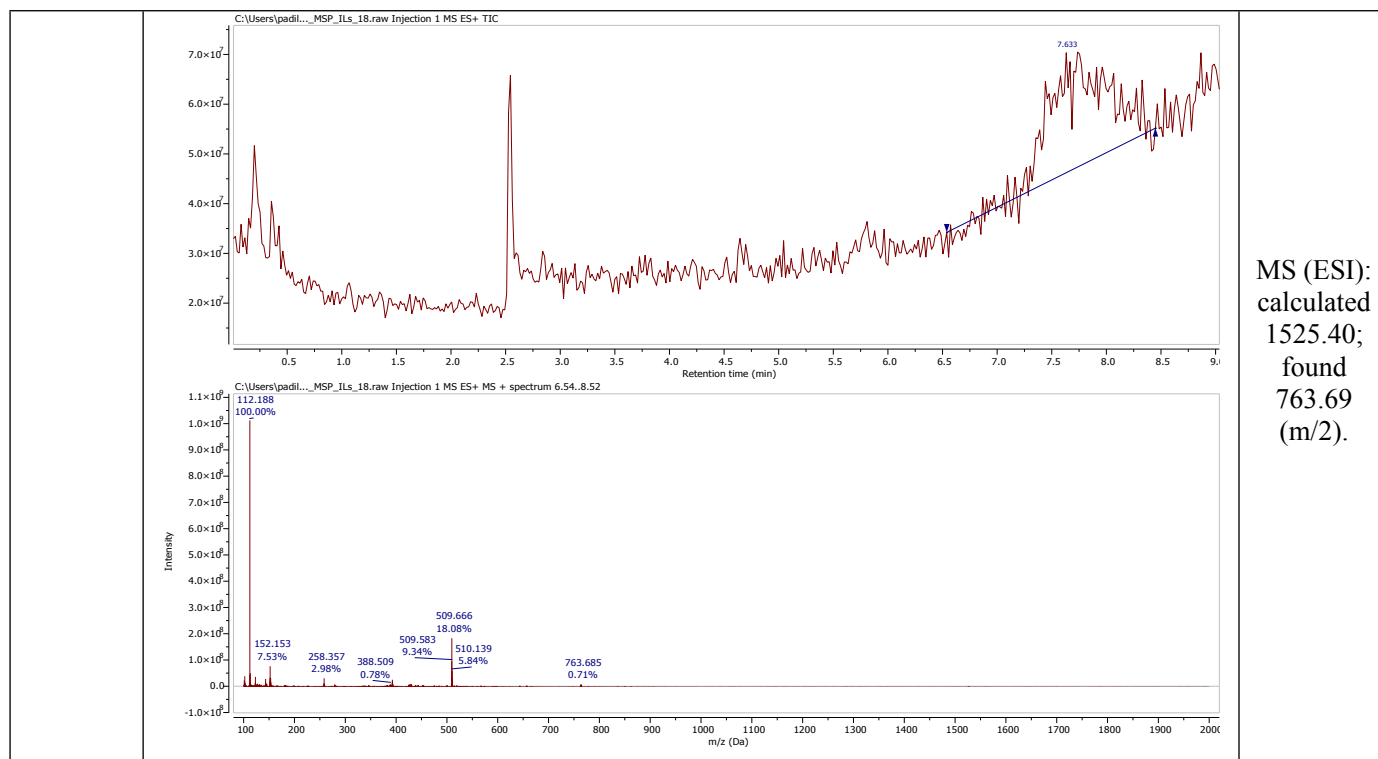

**Table S3.** Abbreviations and nomenclature used throughout the manuscript.

|        |                                               |
|--------|-----------------------------------------------|
| DARPin | designed ankyrin repeat protein               |
| LNP    | lipid nanoparticle                            |
| DOE    | design of experiments                         |
| HTVI   | hydrodynamic tail vein injection              |
| IVIS   | <i>in vivo</i> imaging system                 |
| AFP    | alpha-fetoprotein                             |
| LR     | Lactated Ringer's solution                    |
| DSPC   | 1,2-distearoyl-sn-glycero-3-phosphocholine    |
| DOPE   | 1,2-dioleoyl-sn-glycero-3-phosphoethanolamine |
| DOPC   | 1,2-dioleoyl-sn-glycero-3-phosphocholine      |
| DOTAP  | 1,2-dioleoyl-3-trimethylammonium-propane      |
| PEG    | polyethylene glycol                           |
| TAMRA  | carboxytetramethyl rhodamine                  |
| K27    | pan-RAS binding DARPin                        |
| K27n3  | non-functional control DARPin                 |

|       |                                                    |
|-------|----------------------------------------------------|
| D30   | anionic polypeptide sequence                       |
| S1-10 | large unit of GFP, expressed by reporter cells     |
| S11   | small unit of GFP, fused to K27                    |
| LgBiT | large unit of NanoLuc, expressed by reporter cells |
| HiBiT | small unit of NanoLuc, fused to K27                |
